# Supplementary material for: Mechanical overstimulation causes acute injury and synapse loss followed by fast recovery in lateral-line neuromasts of larval zebrafish
Source: eLife. 2021 Oct 19;10:e69264. doi: 10.7554/eLife.69264 (PMC8555980; doi:10.7554/eLife.69264)
Supplement: Figure 2—source data 1. [file elife-69264-fig2-data1.xlsx]

## Sheet: Sustained - Pooled
no recovery (7 dpf)
	NM3	NM4	NM5	total by exp
MH07	2/8	4/7	5/6	11/21	0.52381
MH25	3/10	5/10	5/8	13/28	0.464286
MH28	3/12	3/9	6/11	12/32	0.375
MH42	6/18	8/19	11/18	25/55	0.454545
MH52	10/19	13/18	16/17	39/54	0.722222
MH57	1/13	7/13	7/9	15/35	0.428571
total by NM	25/110	40/76	50/69
	0.227273	0.526316	0.724638
			total	115/255	0.45098

## Sheet: Periodic - Pooled
no recovery (7 dpf)
	NM3	NM4	NM5	total by exp
MH16	3/22	6/22	5/19	14/63	0.222222
MH24	2/30	4/29	5/27	11/86	0.127907
MH44	4/19	5/17	9/20	18/56	0.321429
MH56	1/26	2/30	2/26	5/82	0.0609756
total by NM	10/97	17/98	21/92
	0.103093	0.173469	0.228261
			total	48/287	0.167247

## Sheet: Sustained
no recovery (7 dpf)
Exp #	fish #	NM3	NM4	NM5
MH07	1	normal	disrupted	disrupted
	2	disrupted	disrupted	disrupted
	3	normal	disrupted	disrupted
	4	normal	normal	?
	5	disrupted	disrupted	disrupted
	6	normal	?	?
	7	normal	normal	normal
	8	normal	normal	disrupted
Exp #	fish #	NM3	NM4	NM5
MH25	1	normal	normal	normal
	2	normal	disrupted	disrupted
	3	disrupted	disrupted	disrupted
	4	disrupted	disrupted	?
	5	normal	normal	normal
	6	normal	disrupted	disrupted
	7	disrupted	disrupted	disrupted
	8	normal	normal	?
	9	normal	normal	normal
	10	normal	normal	disrupted
Exp #	fish #	NM3	NM4	NM5
MH28	1	normal	disrupted	disrupted
	2	disrupted	?	?
	3	normal	?	?
	4	normal	normal	disrupted
	5	normal	?	disrupted
	6	normal	?	normal
	7	normal	normal	normal
	8	normal	normal	normal
	9	normal	normal	disrupted
	10	disrupted	disrupted	disrupted
	11	disrupted	disrupted	disrupted
	12	?	normal	normal
	13	normal	normal	normal
Exp #	fish #	NM3	NM4	NM5
MH42	1	normal	normal	normal
	2	disrupted	disrupted	disrupted
	3	normal	normal	disrupted
	4	normal	normal	normal
	5	disrupted	disrupted	disrupted
	6	disrupted	disrupted	disrupted
	7	normal	normal	normal
	8	normal	normal	normal
	9	normal	?	disrupted
	10	normal	normal	normal
	11	disrupted	disrupted	disrupted
	12	normal	normal	normal
	13	normal	disrupted	disrupted
	14	?	normal	disrupted
	15	normal	normal	normal
	16	disrupted	disrupted	?
	17	disrupted	disrupted	disrupted
	18	normal	?	disrupted
	19	?	normal	?
	20	normal	normal	?
	21	?	disrupted	disrupted
Exp #	fish #	NM3	NM4	NM5
MH52	1	disrupted	disrupted	disrupted
	2	normal	normal	?
	3	normal	?	disrupted
	4	disrupted	disrupted	disrupted
	5	disrupted	disrupted	disrupted
	6	disrupted	disrupted	disrupted
	7	normal	disrupted	disrupted
	8	disrupted	disrupted	disrupted
	9	normal	disrupted	disrupted
	10	normal	normal	?
	11	disrupted	disrupted	disrupted
	12	normal	normal	disrupted
	13	normal	normal	normal
	14	normal	normal	?
	15	disrupted	disrupted	disrupted
	16	disrupted	disrupted	disrupted
	17	?	?	disrupted
	18	disrupted	disrupted	disrupted
	19	normal	disrupted	disrupted
	20	disrupted	disrupted	disrupted
Exp #	fish #	NM3	NM4	NM5
MH57	1	normal	disrupted	disrupted
	2	normal	disrupted	disrupted
	3	normal	normal	normal
	4	normal	normal	?
	5	normal	disrupted	disrupted
	6	normal	normal	disrupted
	7	normal	normal	normal
	8	normal	disrupted	?
	9	normal	normal	?
	10	normal	disrupted	disrupted
	11	normal	normal	?
	12	normal	disrupted	disrupted
	13	disrupted	disrupted	disrupted

## Sheet: Periodic
no recovery (7 dpf)
Exp #	fish #	NM3	NM4	NM5
MH16	1	normal	normal	normal
	2	normal	normal	?
	3	disrupted	disrupted	disrupted
	4	?	disrupted	disrupted
	5	disrupted	disrupted	disrupted
	6	normal	normal	normal
	7	normal	?	normal
	8	normal	disrupted	?
	9	normal	normal	normal
	10	normal	normal	disrupted
	11	normal	normal	?
	12	normal	normal	normal
	13	normal	normal	normal
	14	normal	normal	?
	15	normal	normal	normal
	16	disrupted	disrupted	disrupted
	17	normal	normal	normal
	18	normal	normal	normal
	19	normal	normal	normal
	20	normal	normal	normal
	21	normal	disrupted	normal
	22	normal	normal	normal
	23	normal	normal	normal
Exp #	fish #	NM3	NM4	NM5
MH24	1	normal	normal	normal
	2	normal	normal	?
	3	normal	normal	normal
	4	disrupted	disrupted	disrupted
	5	normal	normal	normal
	6	normal	normal	normal
	7	normal	normal	normal
	8	normal	normal	normal
	9	normal	normal	normal
	10	?	?	disrupted
	11	disrupted	disrupted	disrupted
	12	normal	normal	normal
	13	normal	normal	normal
	14	?	disrupted	?
	15	normal	normal	normal
	16	normal	?	?
	17	normal	normal	normal
	18	normal	normal	normal
	19	normal	?	?
	20	normal	normal	normal
	21	normal	normal	normal
	22	normal	normal	normal
	23	normal	normal	normal
	24	normal	normal	normal
	25	normal	normal	disrupted
	26	normal	disrupted	disrupted
	27	normal	normal	normal
	28	normal	normal	normal
	29	normal	normal	?
	30	normal	normal	normal
	31	normal	normal	normal
	32	normal	normal	normal
Exp #	fish #	NM3	NM4	NM5
MH44	1	normal	normal	?
	2	disrupted	disrupted	disrupted
	3	normal	normal	normal
	4	normal	normal	disrupted
	5	normal	?	normal
	6	normal	normal	disrupted
	7	?	disrupted	disrupted
	8	normal	normal	normal
	9	disrupted	disrupted	disrupted
	10	normal	normal	normal
	11	normal	normal	normal
	12	normal	normal	normal
	13	?	normal	normal
	14	normal	normal	normal
	15	disrupted	disrupted	disrupted
	16	normal	?	disrupted
	17	normal	?	disrupted
	18	normal	?	normal
	19	disrupted	disrupted	disrupted
	20	normal	normal	normal
	21	normal	normal	normal
Exp #	fish #	NM3	NM4	NM5
MH56	1	normal	normal	?
	2	?	normal	normal
	3	normal	normal	normal
	4	?	disrupted	disrupted
	5	normal	normal	?
	6	normal	normal	normal
	7	normal	normal	normal
	8	normal	normal	?
	9	normal	normal	?
	10	normal	normal	normal
	11	normal	normal	normal
	12	normal	normal	normal
	13	normal	normal	normal
	14	normal	normal	normal
	15	normal	?	normal
	16	normal	normal	normal
	17	normal	normal	?
	18	disrupted	?	disrupted
	19	normal	normal	normal
	20	normal	normal	normal
	21	?	normal	normal
	22	normal	normal	normal
	23	normal	normal	normal
	24	?	normal	normal
	25	normal	normal	normal
	26	?	disrupted	?
	27	normal	normal	normal
	28	normal	normal	normal
	29	normal	normal	normal
	30	normal	normal	normal
	31	normal	normal	normal
	32	?	normal	normal
