# Supplementary material for: Mechanical overstimulation causes acute injury and synapse loss followed by fast recovery in lateral-line neuromasts of larval zebrafish
Source: eLife. 2021 Oct 19;10:e69264. doi: 10.7554/eLife.69264 (PMC8555980; doi:10.7554/eLife.69264)
Supplement: Figure 2—source data 2. [file elife-69264-fig2-data2.xlsx]

## Sheet: pooled
lhfpl5b(+/-)							lhfpl5b(KO)
	NM3	NM4	NM5	total by exp				NM3	NM4	NM5	total by exp
MH207	4/16	7/15	9/14	20/45	0.444444		MH207	2/6	2/6	3/6	7/18	0.388889
MH211	3/21	9/20	9/12	21/53	0.396226		MH211	2/8	7/9	5/6	14/23	0.608696
total by NM	7/37	16/35	18/28				total by NM	4/14	9/15	8/12
	0.189189	0.457143	0.642857					0.285714	0.6	0.666667
			total	41/98	0.418367					total	21/41	0.512195

## Sheet: MH207
lhfpl5b(+/-)						lhfpl5b(KO)
Condition/group	fish #	NM3	NM4	NM5		Condition/group	fish #	NM3	NM4	NM5
+/- shake	1	normal	normal	normal		KO shake	1	normal	normal	disrupted
+/- shake	2	normal	disrupted	disrupted		KO shake	2	disrupted	disrupted	disrupted
+/- shake	3	normal	normal	disrupted		KO shake	3	normal	disrupted	normal
+/- shake	4	normal		normal		KO shake	4	normal	normal	normal
+/- shake	5	normal	normal	normal		KO shake	5	normal	normal	normal
+/- shake	6	disrupted	disrupted			KO shake	6	disrupted	normal	disrupted
+/- shake	7	normal	normal	disrupted
+/- shake	8	normal	normal	normal		disrupted frequency		2/6	2/6	3/6
+/- shake	9	disrupted	normal	disrupted		total		7/18
+/- shake	10	normal	normal	disrupted
+/- shake	11	normal	disrupted	disrupted
+/- shake	12	normal	disrupted
+/- shake	13	normal	normal	normal
+/- shake	14	disrupted	disrupted	disrupted
+/- shake	15	disrupted	disrupted	disrupted
+/- shake	16	normal	disrupted	disrupted
disrupted frequency		4/16	7/15	9/14
total		20/45

## Sheet: MH211
lhfpl5b(+/-)						lhfpl5b(KO)
Condition/group	fish #	NM3	NM4	NM5		Condition/group	fish #	NM3	NM4	NM5
+/- shake	1	normal	normal	disrupted		KO shake	1		disrupted
+/- shake	2	normal				KO shake	2	disrupted	disrupted
+/- shake	3	normal	normal			KO shake	3	normal	disrupted
+/- shake	4	normal	normal	disrupted		KO shake	4	normal	disrupted	disrupted
+/- shake	5	normal	normal			KO shake	5	normal	normal	normal
+/- shake	6	normal	normal	normal		KO shake	6	normal	disrupted	disrupted
+/- shake	7	normal	disrupted			KO shake	7	disrupted	disrupted	disrupted
+/- shake	8	normal	disrupted			KO shake	8	normal	normal	disrupted
+/- shake	9	normal	disrupted	disrupted		KO shake	9
+/- shake	10	normal	disrupted	disrupted		KO shake	10	normal	disrupted	disrupted
+/- shake	11	normal	normal	normal
+/- shake	12	disrupted	disrupted			disrupted frequency		2/8	7/9	5/6
+/- shake	13	normal	disrupted			total		14/23
+/- shake	14	normal	disrupted	disrupted
+/- shake	15	normal	normal	disrupted
+/- shake	16	normal	normal	disrupted
+/- shake	17	normal	normal	disrupted
+/- shake	18	disrupted	disrupted	disrupted
+/- shake	19	disrupted	disrupted
+/- shake	20	normal	normal	normal
+/- shake	21	normal	normal
disrupted frequency		3/21	9/20	9/12
total		21/53
