# Supplementary material for: Mechanical overstimulation causes acute injury and synapse loss followed by fast recovery in lateral-line neuromasts of larval zebrafish
Source: eLife. 2021 Oct 19;10:e69264. doi: 10.7554/eLife.69264 (PMC8555980; doi:10.7554/eLife.69264)
Supplement: Figure 4—source data 1. [file elife-69264-fig4-data1.xlsx]

## Sheet: Analysis
SYNAPSE
Type 3 Tests of Fixed Effects
Effect	Num DF	Den DF	F Value	Pr > F
group	2	252	4.24	0.0154
Least Squares Means
Effect	group	Estimate	Standard	DF	t Value	Pr > |t|	Alpha	Lower	Upper
			Error
group	Control	2.946	0.07096	258	41.52	<.0001	0.05	2.8063	3.0858
group	Disrupted	2.758	0.09775	239	28.22	<.0001	0.05	2.5654	2.9505
group	Normal	2.6131	0.09146	264	28.57	<.0001	0.05	2.433	2.7932
Differences of Least Squares Means
Effect	group	_group	Estimate	Standard	DF	t Value	Pr > |t|	Alpha	Lower	Upper
				Error
group	Control	Disrupted	0.188	0.1208	247	1.56	0.1207	0.05	-0.04983	0.4259
group	Control	Normal	0.3329	0.1155	263	2.88	0.0043	0.05	0.1055	0.5604
group	Disrupted	Normal	0.1449	0.1286	264	1.13	0.261	0.05	-0.1084	0.3982
Type 3 Tests of Fixed Effects
Effect	Num DF	Den DF	F Value	Pr > F
nocontrol	1	244	7.2	0.0078
Least Squares Means
Effect	nocontrol	Estimate	Standard	DF	t Value	Pr > |t|	Alpha	Lower	Upper
			Error
nocontrol	0	2.9463	0.07107	258	41.45	<.0001	0.05	2.8064	3.0863
nocontrol	1	2.68	0.06954	220	38.54	<.0001	0.05	2.5429	2.817
Differences of Least Squares Means
Effect	nocontrol	_nocontrol	Estimate	Standard	DF	t Value	Pr > |t|	Alpha	Lower	Upper
				Error
nocontrol	0	1	0.2664	0.09925	244	2.68	0.0078	0.05	0.07087	0.4618

## Sheet: Normal vs disrupted morphology
Experiment ID	Fish ID	Group ID	Neuromast/Position	# hair cells per NM	% hair cells innervated	# synapses/hair cell
MH07	F1	1	3	16	1
MH07	F1	1	4	13	1
MH07	F2	1	4	10	1
MH07	F2	1	5	12	1
MH07	F3	1	3	13	1
MH07	F3	1	4	13	1
MH07	F4	2	4	13	1
MH07	F6	2	4	16	1
MH07	F7	2	4	13	1
MH07	F5	3	4	13	1
MH115	F446	1	4	9	1
MH115	F447	1	5	13	1
MH115	F448	1	5	12	1
MH115	F449	1	3	15	1
MH115	F450	1	5	12	1
MH115	F466	1	5	13		3.23077
MH115	F467	1	4	15		4.33333
MH115	F468	1	5	11		4.18182
MH115	F469	1	3	17		3.82353
MH115	F470	1	4	12		3.75
MH115	F451	2	3	9	1
MH115	F452	2	3	11	1
MH115	F453	2	5	13	1
MH115	F471	2	5	13		2.46154
MH115	F472	2	5	12		4.33333
MH115	F473	2	5	13		2.07692
MH115	F454	3	5	9	1
MH115	F455	3	5	9	1
MH115	F456	3	4	11	0.909091
MH115	F474	3	4	11		2.63636
MH115	F475	3	3	12		1.66667
MH115	F475	3	4	10		3.4
MH115	F476	3	4	13		2.46154
MH121	F488	1	3	13	1
MH121	F488	1	4	14	1
MH121	F489	1	3	14	1
MH121	F490	1	3	13	1
MH121	F491	1	4	15	1
MH121	F508	1	5	14		3.5
MH121	F509	1	4	11		1.54545
MH121	F510	1	4	15		2.93333
MH121	F511	1	5	14		2.21429
MH121	F512	1	5	16		3.375
MH121	F492	2	4	14	1
MH121	F493	2	4	13	1
MH121	F494	2	5	12	1
MH121	F495	2	3	15	1
MH121	F513	2	4	14
MH121	F514	2	5	14		2.07143
MH121	F515	2	5	12		2.75
MH121	F516	2	4	15		2.06667
MH121	F496	3	4	11	0.909091
MH121	F496	3	5	12	0.833333
MH121	F497	3	5	11	0.818182
MH121	F517	3	5	10		2.6
MH121	F518	3	3	13		2.30769
MH121	F518	3	4	18		2
MH128	F530	1	5	11	1
MH128	F531	1	5	14	1
MH128	F532	1	4	14	1
MH128	F533	1	4	14	1
MH128	F534	1	4	16	1
MH128	F535	1	4	16	1
MH128	F536	1	3	16	1
MH128	F537	2	4	14	1
MH128	F538	2	4	16	1
MH128	F539	2	4	17	1
MH128	F540	2	5	15	1
MH128	F541	2	5	12	1
MH128	F542	2	3	14	1
MH13	F14	1	4	10	1
MH13	F15	1	5	8	1
MH13	F28	1	5	11		3
MH13	F29	1	5	10		2.6
MH13	F30	1	4	11		2.63636
MH13	F31	1	4	9		2.33333
MH13	F18	2	4	13	1
MH13	F20	2	5	11	1
MH13	F32	2	4	11		2.81818
MH13	F33	2	5	11		2.18182
MH13	F16	3	4	10	1
MH13	F17	3	4	11	0.818182
MH13	F19	3	4	12	1
MH13	F34	3	5	12		2.25
MH13	F35	3	4	11		2.45455
MH13	F36	3	5	10		3.1
MH13	F37	3	5	9		1.44444
MH143	F556	1	3	13		2.69231
MH143	F557	1	4	14		3.71429
MH143	F558	1	4	15		3.06667
MH143	F559	1	4	12		3.08333
MH143	F560	1	5	13		3.15385
MH143	F561	2	3	14		3.35714
MH143	F562	2	3	17		2.82353
MH143	F563	2	4	15		2.66667
MH143	F564	2	5	12		3.41667
MH143	F565	3	4	16		2.125
MH143	F566	3	5	10		3
MH19	F49	1	4	12		2.66667
MH19	F50	1	4	14		3.14286
MH19	F51	1	4	16		2.8125
MH19	F52	1	4	14		2.78571
MH19	F53	1	5	13		3.15385
MH19	F54	2	4	13		3.61538
MH19	F55	2	5	13		2.46154
MH19	F56	2	4	14		3.5
MH19	F58	2	4	12		3.08333
MH19	F57	3	5	14		2.71429
MH193	F577	1	5	15		2.86667
MH193	F578	1	5	11		2.90909
MH193	F579	1	4	21		1.52381
MH193	F580	1	4	14
MH193	F581	1	5	17		2.76471
MH193	F582	1	3	19		3.57895
MH193	F583	1	3	16		3.3125
MH193	F584	1	3	17		2.52941
MH193	F585	1	3	16		1.5
MH193	F586	1	4	15		2.93333
MH193	F587	2	3	13		2.53846
MH193	F588	2	4	18		2.05556
MH193	F589	2	4	18		2.55556
MH193	F590	2	5	18		1.38889
MH193	F591	2	4	18		2.61111
MH193	F592	2	5	17		2.35294
MH193	F593	2	3	18		2.38889
MH193	F594	2	4	16		2.6875
MH193	F595	2	5	13		1.46154
MH193	F596	3	3	14		0.857143
MH193	F596	3	4	11		2.45455
MH194	F597	1	4	9		2.55556
MH194	F598	1	4	12
MH194	F599	1	5	10
MH194	F600	1	3	13		3.07692
MH194	F601	1	5	14
MH194	F602	1	3	13		3
MH194	F603	1	3	15		2.2
MH194	F604	1	4	10		2.4
MH194	F605	1	5	13
MH194	F607	2	3	13		3
MH194	F608	2	3	13		2
MH194	F609	2	3	14		2.92857
MH194	F610	2	4	13		2.92308
MH194	F611	2	3	15		2.4
MH194	F611	2	5	11		2.63636
MH194	F612	2	4	14		2.14286
MH194	F606	3	4	12
MH194	F607	3	4	7		2.71429
MH194	F608	3	5	7
MH197	F613	1	3	9		3.22222
MH197	F614	1	5	14		2.35714
MH197	F615	1	4	18		2.66667
MH197	F616	1	4	15
MH197	F617	1	3	15		2
MH197	F618	1	4	16		2.875
MH197	F619	1	4	14
MH197	F620	1	3	17		2.35294
MH197	F621	1	3	16		2.8125
MH197	F622	2	3	19		2.52632
MH197	F623	2	3	15		3
MH197	F623	2	4	10		2.3
MH197	F624	2	3	16		2.5625
MH197	F625	2	3	15		2.33333
MH197	F626	2	4	17		1.94118
MH197	F626	2	5	14
MH197	F623	3	5	11
MH197	F625	3	4	14		1.5
MH197	F625	3	5	12		2.16667
MH200	F627	1	3	14		2.78571
MH200	F628	1	3	17		2.94118
MH200	F629	1	4	14		2.28571
MH200	F630	1	3	17		3
MH200	F631	1	5	15		2.93333
MH200	F632	1	4	17		2.47059
MH200	F633	1	5	15		3.46667
MH200	F634	1	5	17		2.52941
MH200	F635	1	3	13		2.92308
MH200	F636	1	4	13		3
MH200	F637	1	4	14		2
MH200	F638	1	3	12		3
MH200	F638	2	5	14		2.71429
MH200	F639	2	3	14		3.07143
MH200	F639	2	4	14		2.64286
MH200	F640	2	3	13		2.61538
MH200	F641	2	3	15		2.8
MH200	F641	2	5	17		3.29412
MH200	F639	3	5	13		2.69231
MH200	F640	3	4	11		3.27273
MH200	F640	3	5	12		2.33333
MH210	F642	1	4	10		3.2
MH210	F643	1	5	15		1.6
MH210	F644	1	3	16		2.8125
MH210	F645	1	3	18		2.72222
MH210	F645	1	4	12		3.25
MH210	F646	1	5	14		2.78571
MH210	F647	2	3	11		2.81818
MH210	F648	2	3	13		1.76923
MH215	F665	1	4	15		2.2
MH215	F666	1	4	15		1.53333
MH215	F667	1	5	18		1.77778
MH215	F668	1	4	16		2.875
MH215	F669	1	5	16
MH215	F670	1	5	14
MH215	F671	2	4	17		2.05882
MH215	F672	2	3	16		1.8125
MH215	F673	3	5	16
MH216	F682	1	3	16		3
MH216	F682	1	5	12		2.41667
MH216	F683	1	3	16		3.1875
MH216	F683	1	4	14
MH216	F684	1	3	19		2.36842
MH216	F684	1	4	16		2.75
MH216	F685	2	4	18		2
MH216	F686	2	3	18		2.11111
MH216	F687	3	4	14		2.57143
MH216	F688	3	4	11		2.45455
MH216	F689	3	4	14		2.07143
MH216	F689	3	5	12		1.91667
MH216	F690	3	5	11		1.27273
MH216	F691	3	5	14
MH25	F59	1	4	13	1
MH25	F60	1	4	7	1
MH25	F61	1	3	12	1
MH25	F62	1	4	10	1
MH25	F63	1	4	11	1
MH25	F75	1	4	11		3.54545
MH25	F76	1	5	11		2.54545
MH25	F77	1	3	11		2.27273
MH25	F78	1	3	10		4.3
MH25	F79	1	4	12		3
MH25	F80	1	3	13		3.15385
MH25	F65	2	3	10	1
MH25	F66	2	4	15	0.866667
MH25	F81	2	3	13		2.76923
MH25	F84	2	4	11		3.72727
MH25	F64	3	4	6	0.833333
MH25	F64	3	3	7	0.857143
MH25	F65	3	5	9	1
MH25	F67	3	3	13	1
MH25	F67	3	4	12	0.916667
MH25	F67	3	5	9	0.666667
MH25	F81	3	4	9		3.66667
MH25	F81	3	5	13		3.15385
MH25	F82	3	3	9		3.33333
MH25	F83	3	3	9		3.66667
MH28	F96	1	4	9	1
MH28	F97	1	4	13	1
MH28	F98	1	4	12	1
MH28	F99	1	5	13	1
MH28	F100	1	3	15	1
MH28	F101	1	3	13	1
MH28	F102	1	4	12	1
MH28	F118	1	5	11		2.81818
MH28	F119	1	5	11		2.09091
MH28	F120	1	3	10		1.8
MH28	F121	1	4	10		3.6
MH28	F122	1	5	10		1.3
MH28	F123	1	3	12		2.58333
MH28	F124	1	5	11		1
MH28	F103	2	4	13	1
MH28	F104	2	3	12	1
MH28	F105	2	3	13	1
MH28	F108	2	5	9	1
MH28	F127	2	3	13		1.61538
MH28	F128	2	3	9		2.44444
MH28	F129	2	4	11		2.18182
MH28	F104	3	4	13	1
MH28	F106	3	3	10	0.8
MH28	F106	3	4	11	0.909091
MH28	F107	3	5	8	1
MH28	F108	3	4	10	1
MH28	F125	3	5	13		3.23077
MH28	F125	3	4	13		0.538462
MH28	F126	3	3	13		1.30769
MH28	F128	3	5	13		0.0769231
MH28	F129	3	5	11		1.81818
MH42	F142	1	4	11	1
MH42	F143	1	3	11	1
MH42	F144	1	4	10	1
MH42	F145	1	4	9	1
MH42	F146	1	4	8	1
MH42	F146	1	5	9	1
MH42	F147	1	4	12	1
MH42	F167	1	4	14		3.57143
MH42	F168	1	3	12		4
MH42	F169	1	5	12		3
MH42	F170	1	4	12		3.16667
MH42	F171	1	4	12		3
MH42	F172	1	5	13		4.07692
MH42	F173	1	5	13		2.61538
MH42	F148	2	3	13	1
MH42	F148	2	4	11	1
MH42	F149	2	4	13	1
MH42	F150	2	4	10	1
MH42	F151	2	4	11	1
MH42	F174	2	4	10		2.7
MH42	F174	2	5	13		3.15385
MH42	F175	2	4	13		3.23077
MH42	F152	3	5	10	0.9
MH42	F153	3	4	11	1
MH42	F153	3	5	9	0.888889
MH42	F154	3	4	10	0.9
MH42	F176	3	4	9		3.55556
MH42	F176	3	5	9		3.66667
MH42	F177	3	4	12		2.75
MH42	F178	3	5	9		3
MH42	F179	3	5	11		3.45455
MH52	F232	1	4	12	1
MH52	F233	1	3	13	1
MH52	F233	1	4	14	1
MH52	F234	1	3	13	1
MH52	F234	1	4	15	1
MH52	F256	1	4	16		3.75
MH52	F257	1	4	15		3.4
MH52	F258	1	4	13		4.84615
MH52	F259	1	4	16		3.0625
MH52	F260	1	4	12		4.75
MH52	F235	2	4	13	1
MH52	F235	2	4	14	1
MH52	F236	2	3	14	1
MH52	F240	2	3	13	1
MH52	F261	2	4	15		3.86667
MH52	F262	2	3	15		2.66667
MH52	F236	3	4	7	1
MH52	F237	3	4	14	0.785714
MH52	F238	3	4	13	0.923077
MH52	F239	3	4	12	1
MH52	F240	3	5	11	1
MH52	F263	3	5	9		3.22222
MH52	F264	3	4	12		3.58333
MH52	F265	3	3	15		4
MH52	F266	3	3	16		3.625
MH57	F286	1	3	12	1	3.33333
MH57	F287	1	4	12	1	3.91667
MH57	F288	1	4	12	1	3.41667
MH57	F289	1	5	14	1	3.35714
MH57	F290	1	3	11	1	4.90909
MH57	F291	1	3	14	1	3.78571
MH57	F294	2	3	12	1	3.16667
MH57	F297	2	3	11	1	3.54545
MH57	F292	3	5	10	0.9	3.7
MH57	F293	3	4	10	0.9	4.6
MH57	F293	3	5	8	1	3.875
MH57	F295	3	4	10	1	2.9
MH57	F296	3	5	10	0.9	3.5
MH57	F298	3	4	10	1	2.8
MH57	F299	3	4	12	0.916667	3.33333
MH57	F299	3	5	8	1	4.25
MH57	F300	3	3	12	0.916667	3.33333
MH57	F300	3	4	10	1	4.9
MH57	F300	3	5	9	1	4
MH61	F301	1	4	12	1	3.5
MH61	F302	1	5	10	1	4.3
MH61	F303	1	5	11	1	3.45455
MH61	F304	1	3	13	1	3.38462
MH61	F305	1	4	14	1	2.64286
MH61	F306	1	4	15	1	2.8
MH61	F307	1	4	10	1	3.6
MH61	F308	1	3	11	1	3.18182
MH61	F309	1	4	14	1	3.21429
MH61	F310	2	3	13	1	2.84615
MH61	F311	2	3	12	1	2.83333
MH61	F316	2	3	15	1	2.33333
MH61	F310	3	4	10	1	4.2
MH61	F312	3	4	11	0.818182	3.09091
MH61	F313	3	3	12	0.916667	3.41667
MH61	F313	3	4	10	1	2.8
MH61	F314	3	3	15	1	2.53333
MH61	F314	3	4	15	0.866667	2.26667
MH61	F314	3	5	6	1	3.66667
MH61	F315	3	3	7	0.857143	5.42857
MH61	F315	3	4	6	0.833333	5.5
MH61	F316	3	4	14	1	2.42857
MH61	F316	3	5	10	0.8	1.1
MH64	F317	1	4	11	1
MH64	F318	1	4	11	1
MH64	F319	1	5	13	1
MH64	F320	1	5	11	1
MH64	F702	1	5	14	1
MH64	F321	1	4	12	1
MH64	F321	1	5	11	1
MH64	F345	1	4	13		2.92308
MH64	F346	1	5	9		4.11111
MH64	F347	1	5	12		2.16667
MH64	F348	1	5	13		2.46154
MH64	F349	1	4	12
MH64	F350	1	5	11		3.27273
MH64	F322	2	5	14	1
MH64	F323	2	4	9	1
MH64	F324	2	4	11	1
MH64	F325	2	5	11	1
MH64	F326	2	4	10	1
MH64	F351	2	4	14		2
MH64	F352	2	5	9		2.22222
MH64	F353	2	4	12		1.41667
MH64	F354	2	3	14		2.64286
MH64	F355	2	4	12		2.33333
MH64	F355	2	5	10		2.3
MH64	F356	2	3	11		1.90909
MH64	F327	3	5	10	1
MH64	F328	3	5	10	1
MH64	F329	3	5	12	1
MH69	F368	1	4	16	1
MH69	F368	1	5	14	1
MH69	F369	1	4	14	1
MH69	F370	1	4	12	1
MH69	F371	1	3	13	1
MH69	F371	1	4	11	1
MH69	F372	1	5	13	1
MH69	F373	2	3	15	1
MH69	F374	2	4	14	1
MH69	F375	2	3	15	1
MH69	F376	3	3	14	0.857143
MH69	F376	3	4	12	0.666667
MH69	F377	3	3	15	0.933333
MH69	F377	3	4	12	0.833333
MH69	F377	3	5	11	0.818182
MH69	F378	3	4	14	0.928571
MH79	F391	1	4	12	1
MH79	F392	1	4	11	1
MH79	F393	1	3	12	1
MH79	F394	1	4	13	1
MH79	F395	1	4	11	1
MH79	F396	1	4	14	1
MH79	F411	1	5	12		2.25
MH79	F412	1	4	12		3.16667
MH79	F413	1	3	12		2.58333
MH79	F414	1	3	14
MH79	F414	1	4	12		2.16667
MH79	F415	1	5	15		3
MH79	F397	2	3	11	1
MH79	F416	2	4	12		2.91667
MH79	F417	2	4	11		2.90909
MH79	F397	3	4	10	0.8
MH79	F398	3	3	16	1
MH79	F398	3	4	12	0.833333
MH79	F399	3	3	12	1
MH79	F399	3	5	11	0.909091
MH79	F400	3	4	9	0.888889
MH79	F418	3	4	14		2.28571
MH79	F419	3	3	14		1.85714
MH79	F420	3	4	14		2.07143
MH79	F421	3	3	11		2.18182
MH79	F421	3	4	12		2.66667
MH79	F421	3	5	13		0.923077
MH81	F430	1	4	14	1
MH81	F431	1	3	11	1
MH81	F431	1	4	12	1
MH81	F432	1	3	13	1
MH81	F433	1	5	11	1
MH81	F434	2	3	9	1
MH81	F434	2	5	9	1
MH81	F435	2	5	12	1
MH81	F436	2	4	10	1
MH81	F437	2	4	13	1
MH81	F437	2	5	10	1
MH81	F438	3	4	9	1
MH81	F438	3	5	9	1
MH81	F439	3	4	11	1
MH81	F439	3	5	10	1

## Sheet: Pooled morphology
Experiment ID	Fish ID	Group ID	Neuromast/Position	# hair cells per NM	% hair cells innervated	# synapses/hair cell
MH07	F1	1	3	16	1
MH07	F1	1	4	13	1
MH07	F2	1	4	10	1
MH07	F2	1	5	12	1
MH07	F3	1	3	13	1
MH07	F3	1	4	13	1
MH07	F4	13	4	13	1
MH07	F5	13	4	13	1
MH07	F6	13	4	16	1
MH07	F7	13	4	13	1
MH13	F14	1	4	10	1
MH13	F15	1	5	8	1
MH13	F16	13	4	10	1
MH13	F17	13	4	11	0.818182
MH13	F18	13	4	13	1
MH13	F19	13	4	12	1
MH13	F20	13	5	11	1
MH13	F28	1	5	11		3
MH13	F29	1	5	10		2.6
MH13	F30	1	4	11		2.63636
MH13	F31	1	4	9		2.33333
MH13	F32	13	4	11		2.81818
MH13	F33	13	5	11		2.18182
MH13	F34	13	5	12		2.25
MH13	F35	13	4	11		2.45455
MH13	F36	13	5	10		3.1
MH13	F37	13	5	9		1.44444
MH19	F49	1	4	12		2.66667
MH19	F50	1	4	14		3.14286
MH19	F51	1	4	16		2.8125
MH19	F52	1	4	14		2.78571
MH19	F53	1	5	13		3.15385
MH19	F54	13	4	13		3.61538
MH19	F55	13	5	13		2.46154
MH19	F56	13	4	14		3.5
MH19	F57	13	5	14		2.71429
MH19	F58	13	4	12		3.08333
MH25	F59	1	4	13	1
MH25	F60	1	4	7	1
MH25	F61	1	3	12	1
MH25	F62	1	4	10	1
MH25	F63	1	4	11	1
MH25	F64	13	4	6	0.833333
MH25	F64	13	3	7	0.857143
MH25	F65	13	3	10	1
MH25	F65	13	5	9	1
MH25	F66	13	4	15	0.866667
MH25	F67	13	3	13	1
MH25	F67	13	4	12	0.916667
MH25	F67	13	5	9	0.666667
MH25	F75	1	4	11		3.54545
MH25	F76	1	5	11		2.54545
MH25	F77	1	3	11		2.27273
MH25	F78	1	3	10		4.3
MH25	F79	1	4	12		3
MH25	F80	1	3	13		3.15385
MH25	F81	13	3	13		2.76923
MH25	F81	13	4	9		3.66667
MH25	F81	13	5	13		3.15385
MH25	F82	13	3	9		3.33333
MH25	F83	13	3	9		3.66667
MH25	F84	13	4	11		3.72727
MH28	F96	1	4	9	1
MH28	F97	1	4	13	1
MH28	F98	1	4	12	1
MH28	F99	1	5	13	1
MH28	F100	1	3	15	1
MH28	F101	1	3	13	1
MH28	F102	1	4	12	1
MH28	F103	13	4	13	1
MH28	F104	13	3	12	1
MH28	F104	13	4	13	1
MH28	F105	13	3	13	1
MH28	F106	13	3	10	0.8
MH28	F106	13	4	11	0.909091
MH28	F107	13	5	8	1
MH28	F108	13	4	10	1
MH28	F108	13	5	9	1
MH28	F118	1	5	11		2.81818
MH28	F119	1	5	11		2.09091
MH28	F120	1	3	10		1.8
MH28	F121	1	4	10		3.6
MH28	F122	1	5	10		1.3
MH28	F123	1	3	12		2.58333
MH28	F124	1	5	11		1
MH28	F125	13	5	13		3.23077
MH28	F125	13	4	13		0.538462
MH28	F126	13	3	13		1.30769
MH28	F127	13	3	13		1.61538
MH28	F128	13	3	9		2.44444
MH28	F128	13	5	13		0.0769231
MH28	F129	13	4	11		2.18182
MH28	F129	13	5	11		1.81818
MH42	F142	1	4	11	1
MH42	F143	1	3	11	1
MH42	F144	1	4	10	1
MH42	F145	1	4	9	1
MH42	F146	1	4	8	1
MH42	F146	1	5	9	1
MH42	F147	1	4	12	1
MH42	F148	13	3	13	1
MH42	F148	13	4	11	1
MH42	F149	13	4	13	1
MH42	F150	13	4	10	1
MH42	F151	13	4	11	1
MH42	F152	13	5	10	0.9
MH42	F153	13	4	11	1
MH42	F153	13	5	9	0.888889
MH42	F154	13	4	10	0.9
MH42	F167	1	4	14		3.57143
MH42	F168	1	3	12		4
MH42	F169	1	5	12		3
MH42	F170	1	4	12		3.16667
MH42	F171	1	4	12		3
MH42	F172	1	5	13		4.07692
MH42	F173	1	5	13		2.61538
MH42	F174	13	4	10		2.7
MH42	F174	13	5	13		3.15385
MH42	F175	13	4	13		3.23077
MH42	F176	13	4	9		3.55556
MH42	F176	13	5	9		3.66667
MH42	F177	13	4	12		2.75
MH42	F178	13	5	9		3
MH42	F179	13	5	11		3.45455
MH52	F232	1	4	12	1
MH52	F233	1	3	13	1
MH52	F233	1	4	14	1
MH52	F234	1	3	13	1
MH52	F234	1	4	15	1
MH52	F235	13	4	13	1
MH52	F235	13	4	14	1
MH52	F236	13	3	14	1
MH52	F236	13	4	7	1
MH52	F237	13	4	14	0.785714
MH52	F238	13	4	13	0.923077
MH52	F239	13	4	12	1
MH52	F240	13	3	13	1
MH52	F240	13	5	11	1
MH52	F256	1	4	16		3.75
MH52	F257	1	4	15		3.4
MH52	F258	1	4	13		4.84615
MH52	F259	1	4	16		3.0625
MH52	F260	1	4	12		4.75
MH52	F261	13	4	15		3.86667
MH52	F262	13	3	15		2.66667
MH52	F263	13	5	9		3.22222
MH52	F264	13	4	12		3.58333
MH52	F265	13	3	15		4
MH52	F266	13	3	16		3.625
MH57	F286	1	3	12	1	3.33333
MH57	F287	1	4	12	1	3.91667
MH57	F288	1	4	12	1	3.41667
MH57	F289	1	5	14	1	3.35714
MH57	F290	1	3	11	1	4.90909
MH57	F291	1	3	14	1	3.78571
MH57	F292	13	5	10	0.9	3.7
MH57	F293	13	4	10	0.9	4.6
MH57	F293	13	5	8	1	3.875
MH57	F294	13	3	12	1	3.16667
MH57	F295	13	4	10	1	2.9
MH57	F296	13	5	10	0.9	3.5
MH57	F297	13	3	11	1	3.54545
MH57	F298	13	4	10	1	2.8
MH57	F299	13	4	12	0.916667	3.33333
MH57	F299	13	5	8	1	4.25
MH57	F300	13	3	12	0.916667	3.33333
MH57	F300	13	4	10	1	4.9
MH57	F300	13	5	9	1	4
MH61	F301	1	4	12	1	3.5
MH61	F302	1	5	10	1	4.3
MH61	F303	1	5	11	1	3.45455
MH61	F304	1	3	13	1	3.38462
MH61	F305	1	4	14	1	2.64286
MH61	F306	1	4	15	1	2.8
MH61	F307	1	4	10	1	3.6
MH61	F308	1	3	11	1	3.18182
MH61	F309	1	4	14	1	3.21429
MH61	F310	13	3	13	1	2.84615
MH61	F310	13	4	10	1	4.2
MH61	F311	13	3	12	1	2.83333
MH61	F312	13	4	11	0.818182	3.09091
MH61	F313	13	3	12	0.916667	3.41667
MH61	F313	13	4	10	1	2.8
MH61	F314	13	3	15	1	2.53333
MH61	F314	13	4	15	0.866667	2.26667
MH61	F314	13	5	6	1	3.66667
MH61	F315	13	3	7	0.857143	5.42857
MH61	F315	13	4	6	0.833333	5.5
MH61	F316	13	3	15	1	2.33333
MH61	F316	13	4	14	1	2.42857
MH61	F316	13	5	10	0.8	1.1
MH64	F317	1	4	11	1
MH64	F318	1	4	11	1
MH64	F319	1	5	13	1
MH64	F320	1	5	11	1
MH64	F702	1	5	14	1
MH64	F321	1	4	12	1
MH64	F321	1	5	11	1
MH64	F322	13	5	14	1
MH64	F323	13	4	9	1
MH64	F324	13	4	11	1
MH64	F325	13	5	11	1
MH64	F326	13	4	10	1
MH64	F327	13	5	10	1
MH64	F328	13	5	10	1
MH64	F329	13	5	12	1
MH64	F345	1	4	13		2.92308
MH64	F346	1	5	9		4.11111
MH64	F347	1	5	12		2.16667
MH64	F348	1	5	13		2.46154
MH64	F349	1	4	12
MH64	F350	1	5	11		3.27273
MH64	F351	13	4	14		2
MH64	F352	13	5	9		2.22222
MH64	F353	13	4	12		1.41667
MH64	F354	13	3	14		2.64286
MH64	F355	13	4	12		2.33333
MH64	F355	13	5	10		2.3
MH64	F356	13	3	11		1.90909
MH69	F368	1	4	16	1
MH69	F368	1	5	14	1
MH69	F369	1	4	14	1
MH69	F370	1	4	12	1
MH69	F371	1	3	13	1
MH69	F371	1	4	11	1
MH69	F372	1	5	13	1
MH69	F373	13	3	15	1
MH69	F374	13	4	14	1
MH69	F375	13	3	15	1
MH69	F376	13	3	14	0.857143
MH69	F376	13	4	12	0.666667
MH69	F377	13	3	15	0.933333
MH69	F377	13	4	12	0.833333
MH69	F377	13	5	11	0.818182
MH69	F378	13	4	14	0.928571
MH79	F391	1	4	12	1
MH79	F392	1	4	11	1
MH79	F393	1	3	12	1
MH79	F394	1	4	13	1
MH79	F395	1	4	11	1
MH79	F396	1	4	14	1
MH79	F397	13	3	11	1
MH79	F397	13	4	10	0.8
MH79	F398	13	3	16	1
MH79	F398	13	4	12	0.833333
MH79	F399	13	3	12	1
MH79	F399	13	5	11	0.909091
MH79	F400	13	4	9	0.888889
MH79	F411	1	5	12		2.25
MH79	F412	1	4	12		3.16667
MH79	F413	1	3	12		2.58333
MH79	F414	1	3	14
MH79	F414	1	4	12		2.16667
MH79	F415	1	5	15		3
MH79	F416	13	4	12		2.91667
MH79	F417	13	4	11		2.90909
MH79	F418	13	4	14		2.28571
MH79	F419	13	3	14		1.85714
MH79	F420	13	4	14		2.07143
MH79	F421	13	3	11		2.18182
MH79	F421	13	4	12		2.66667
MH79	F421	13	5	13		0.923077
MH81	F430	1	4	14	1
MH81	F431	1	3	11	1
MH81	F431	1	4	12	1
MH81	F432	1	3	13	1
MH81	F433	1	5	11	1
MH81	F434	13	3	9	1
MH81	F434	13	5	9	1
MH81	F435	13	5	12	1
MH81	F436	13	4	10	1
MH81	F437	13	4	13	1
MH81	F437	13	5	10	1
MH81	F438	13	4	9	1
MH81	F438	13	5	9	1
MH81	F439	13	4	11	1
MH81	F439	13	5	10	1
MH115	F446	1	4	9	1
MH115	F447	1	5	13	1
MH115	F448	1	5	12	1
MH115	F449	1	3	15	1
MH115	F450	1	5	12	1
MH115	F451	13	3	9	1
MH115	F452	13	3	11	1
MH115	F453	13	5	13	1
MH115	F454	13	5	9	1
MH115	F455	13	5	9	1
MH115	F456	13	4	11	0.909091
MH115	F466	1	5	13		3.23077
MH115	F467	1	4	15		4.33333
MH115	F468	1	5	11		4.18182
MH115	F469	1	3	17		3.82353
MH115	F470	1	4	12		3.75
MH115	F471	13	5	13		2.46154
MH115	F472	13	5	12		4.33333
MH115	F473	13	5	13		2.07692
MH115	F474	13	4	11		2.63636
MH115	F475	13	3	12		1.66667
MH115	F475	13	4	10		3.4
MH115	F476	13	4	13		2.46154
MH121	F488	1	3	13	1
MH121	F488	1	4	14	1
MH121	F489	1	3	14	1
MH121	F490	1	3	13	1
MH121	F491	1	4	15	1
MH121	F492	13	4	14	1
MH121	F493	13	4	13	1
MH121	F494	13	5	12	1
MH121	F495	13	3	15	1
MH121	F496	13	4	11	0.909091
MH121	F496	13	5	12	0.833333
MH121	F497	13	5	11	0.818182
MH121	F508	1	5	14		3.5
MH121	F509	1	4	11		1.54545
MH121	F510	1	4	15		2.93333
MH121	F511	1	5	14		2.21429
MH121	F512	1	5	16		3.375
MH121	F513	13	4	14
MH121	F514	13	5	14		2.07143
MH121	F515	13	5	12		2.75
MH121	F516	13	4	15		2.06667
MH121	F517	13	5	10		2.6
MH121	F518	13	3	13		2.30769
MH121	F518	13	4	18		2
MH128	F530	1	5	11	1
MH128	F531	1	5	14	1
MH128	F532	1	4	14	1
MH128	F533	1	4	14	1
MH128	F534	1	4	16	1
MH128	F535	1	4	16	1
MH128	F536	1	3	16	1
MH128	F537	13	4	14	1
MH128	F538	13	4	16	1
MH128	F539	13	4	17	1
MH128	F540	13	5	15	1
MH128	F541	13	5	12	1
MH128	F542	13	3	14	1
MH143	F556	1	3	13		2.69231
MH143	F557	1	4	14		3.71429
MH143	F558	1	4	15		3.06667
MH143	F559	1	4	12		3.08333
MH143	F560	1	5	13		3.15385
MH143	F561	13	3	14		3.35714
MH143	F562	13	3	17		2.82353
MH143	F563	13	4	15		2.66667
MH143	F564	13	5	12		3.41667
MH143	F565	13	4	16		2.125
MH143	F566	13	5	10		3
MH193	F577	1	5	15		2.86667
MH193	F578	1	5	11		2.90909
MH193	F579	1	4	21		1.52381
MH193	F580	1	4	14
MH193	F581	1	5	17		2.76471
MH193	F582	1	3	19		3.57895
MH193	F583	1	3	16		3.3125
MH193	F584	1	3	17		2.52941
MH193	F585	1	3	16		1.5
MH193	F586	1	4	15		2.93333
MH193	F587	13	3	13		2.53846
MH193	F588	13	4	18		2.05556
MH193	F589	13	4	18		2.55556
MH193	F590	13	5	18		1.38889
MH193	F591	13	4	18		2.61111
MH193	F592	13	5	17		2.35294
MH193	F593	13	3	18		2.38889
MH193	F594	13	4	16		2.6875
MH193	F595	13	5	13		1.46154
MH193	F596	13	3	14		0.857143
MH193	F596	13	4	11		2.45455
MH194	F597	1	4	9		2.55556
MH194	F598	1	4	12
MH194	F599	1	5	10
MH194	F600	1	3	13		3.07692
MH194	F601	1	5	14
MH194	F602	1	3	13		3
MH194	F603	1	3	15		2.2
MH194	F604	1	4	10		2.4
MH194	F605	1	5	13
MH194	F606	13	4	12
MH194	F607	13	3	13		3
MH194	F607	13	4	7		2.71429
MH194	F608	13	3	13		2
MH194	F608	13	5	7
MH194	F609	13	3	14		2.92857
MH194	F610	13	4	13		2.92308
MH194	F611	13	3	15		2.4
MH194	F611	13	5	11		2.63636
MH194	F612	13	4	14		2.14286
MH197	F613	1	3	9		3.22222
MH197	F614	1	5	14		2.35714
MH197	F615	1	4	18		2.66667
MH197	F616	1	4	15
MH197	F617	1	3	15		2
MH197	F618	1	4	16		2.875
MH197	F619	1	4	14
MH197	F620	1	3	17		2.35294
MH197	F621	1	3	16		2.8125
MH197	F622	13	3	19		2.52632
MH197	F623	13	3	15		3
MH197	F623	13	4	10		2.3
MH197	F623	13	5	11
MH197	F624	13	3	16		2.5625
MH197	F625	13	3	15		2.33333
MH197	F625	13	4	14		1.5
MH197	F625	13	5	12		2.16667
MH197	F626	13	4	17		1.94118
MH197	F626	13	5	14
MH200	F627	1	3	14		2.78571
MH200	F628	1	3	17		2.94118
MH200	F629	1	4	14		2.28571
MH200	F630	1	3	17		3
MH200	F631	1	5	15		2.93333
MH200	F632	1	4	17		2.47059
MH200	F633	1	5	15		3.46667
MH200	F634	1	5	17		2.52941
MH200	F635	1	3	13		2.92308
MH200	F636	1	4	13		3
MH200	F637	1	4	14		2
MH200	F638	1	3	12		3
MH200	F638	13	5	14		2.71429
MH200	F639	13	3	14		3.07143
MH200	F639	13	4	14		2.64286
MH200	F639	13	5	13		2.69231
MH200	F640	13	3	13		2.61538
MH200	F640	13	4	11		3.27273
MH200	F640	13	5	12		2.33333
MH200	F641	13	3	15		2.8
MH200	F641	13	5	17		3.29412
MH210	F642	1	4	10		3.2
MH210	F643	1	5	15		1.6
MH210	F644	1	3	16		2.8125
MH210	F645	1	3	18		2.72222
MH210	F645	1	4	12		3.25
MH210	F646	1	5	14		2.78571
MH210	F647	13	3	11		2.81818
MH210	F648	13	3	13		1.76923
MH215	F665	1	4	15		2.2
MH215	F666	1	4	15		1.53333
MH215	F667	1	5	18		1.77778
MH215	F668	1	4	16		2.875
MH215	F669	1	5	16
MH215	F670	1	5	14
MH215	F671	13	4	17		2.05882
MH215	F672	13	3	16		1.8125
MH215	F673	13	5	16
MH216	F682	1	3	16		3
MH216	F682	1	5	12		2.41667
MH216	F683	1	3	16		3.1875
MH216	F683	1	4	14
MH216	F684	1	3	19		2.36842
MH216	F684	1	4	16		2.75
MH216	F685	13	4	18		2
MH216	F686	13	3	18		2.11111
MH216	F687	13	4	14		2.57143
MH216	F688	13	4	11		2.45455
MH216	F689	13	4	14		2.07143
MH216	F689	13	5	12		1.91667
MH216	F690	13	5	11		1.27273
MH216	F691	13	5	14

## Sheet: Group "dictionary"
Group #	Group description
1	WT, control, no recovery
2	WT, exposed, normal morphology, no recovery
3	WT, exposed, disrupted morphology, no recovery

## Sheet: Sheet1
Variables in Creation Order
#	Variable	Type	Len	Format	Informat	Label
1	EXP	Char	5	5	5	Experiment ID
2	FISH	Char	4	4	4	Fish ID
3	GroupID	Num	8	F2.		Group ID
4	POSITION	Num	8	F2.		Neuromast/Position
5	HAIRCELL	Num	8	F3.		# hair cells per NM
6	haircellsinnervated	Num	8			% hair cells innervated
7	SYNAPSE	Num	8	F17.3		# synapses/hair cell
8	innerv	Num	8	F8.4		innerv
9	CONDITION	Num	8
10	group	Num	8
11	long	Num	8
