# Supplementary material for: Mechanical overstimulation causes acute injury and synapse loss followed by fast recovery in lateral-line neuromasts of larval zebrafish
Source: eLife. 2021 Oct 19;10:e69264. doi: 10.7554/eLife.69264 (PMC8555980; doi:10.7554/eLife.69264)
Supplement: Figure 7—source data 1. [file elife-69264-fig7-data1.xlsx]

## Sheet: Sustained - Pooled
no recovery (7 dpf)							2h recovery (7 dpf)							48h recovery (9 dpf)
	NM3	NM4	NM5	total by exp				NM3	NM4	NM5	total by exp				NM3	NM4	NM5	total by exp
only cohort w/ 2 h recovery							MH07	1/3	1/2	2/3	4/8	0.5		MH28	1/9	1/9	1/8	3/26	0.115385
MH07	2/8	4/7	5/6	11/21	0.52381		MH25	0/8	0/7	1/6	1/21	0.047619		MH42	0/25	0/23	0/21	0/69	0
MH25	3/10	5/10	5/8	13/28	0.464286		MH42	3/15	1/14	6/15	10/44	0.227273		MH50	0/7	0/6	0/6	0/19	0
MH42	6/18	8/19	11/18	25/55	0.454545		MH52	5/10	4/9	6/12	15/31	0.483871		MH52	0/8	0/8	0/6	0/22	0
MH52	10/19	13/18	16/17	39/54	0.722222		total by NM	9/36	6/32	15/36				MH54	0/21	0/22	0/19	0/62	0
total by NM	21/55	30/54	37/49	88/158				0.25	0.1875	0.416667				total by NM	1/70	1/68	1/60
	38.1818	55.5556	75.5102	55.6962						total	30/104	0.288462			0.0142857	0.0147059	0.0166667
																	total	3/198	0.0151515
only cohort w/ 48 h recovery
MH28	3/12	3/9	6/11	12/32	0.375
MH42	6/18	8/19	11/18	25/55	0.454545
MH52	10/19	13/18	16/17	39/54	0.722222
total by NM	19/49	24/46	33/46	76/141
	38.7755	52.1739	71.7391	53.9007

## Sheet: Sustained
no recovery (7 dpf)						2h recovery (7 dpf)						48h recovery (9 dpf)
Exp #	fish #	NM3	NM4	NM5		Exp #	fish #	NM3	NM4	NM5
MH07	1	normal	disrupted	disrupted		MH07	1	normal	?	disrupted
	2	disrupted	disrupted	disrupted			2	disrupted	disrupted	disrupted
	3	normal	disrupted	disrupted			3	normal	normal	normal
	4	normal	normal	?
	5	disrupted	disrupted	disrupted
	6	normal	?	?
	7	normal	normal	normal
	8	normal	normal	disrupted
Exp #	fish #	NM3	NM4	NM5		Exp #	fish #	NM3	NM4	NM5
MH25	1	normal	normal	normal		MH25	1	normal	normal	normal
	2	normal	disrupted	disrupted			2	normal	normal	normal
	3	disrupted	disrupted	disrupted			3	normal	normal	?
	4	disrupted	disrupted	?			4	normal	normal	?
	5	normal	normal	normal			5	normal	normal	normal
	6	normal	disrupted	disrupted			6	normal	?	?
	7	disrupted	disrupted	disrupted			1	normal	normal	normal
	8	normal	normal	?			2	normal	normal	normal
	9	normal	normal	normal			3	?	?	disrupted
	10	normal	normal	disrupted
Exp #	fish #	NM3	NM4	NM5								Exp #	fish #	NM3	NM4	NM5
MH28	1	normal	disrupted	disrupted								MH28	1	normal	normal	normal
	2	disrupted	?	?									2	normal	normal	normal
	3	normal	?	?									3	normal	normal	normal
	4	normal	normal	disrupted
	5	normal	?	disrupted									5	normal	normal	normal
	6	normal	?	normal									6	?	disrupted	disrupted
	7	normal	normal	normal									7	normal	normal	normal
	8	normal	normal	normal									1	normal	normal	normal
	9	normal	normal	disrupted									2	normal	normal	?
	10	disrupted	disrupted	disrupted									3	normal	normal	normal
	11	disrupted	disrupted	disrupted									4	disrupted	?	?
	12	?	normal	normal
	13	normal	normal	normal
Exp #	fish #	NM3	NM4	NM5		Exp #	fish #	NM3	NM4	NM5
MH42	1	normal	normal	normal		MH42	1	disrupted	disrupted	?
	2	disrupted	disrupted	disrupted			2	?	normal	?
	3	normal	normal	disrupted			3	normal	normal	normal
	4	normal	normal	normal			4	normal	normal	normal
	5	disrupted	disrupted	disrupted
	6	disrupted	disrupted	disrupted			6	normal	normal	normal
	7	normal	normal	normal			7	normal	normal	normal
	8	normal	normal	normal			8	?	?	disrupted
	9	normal	?	disrupted			9	normal	normal	normal
	10	normal	normal	normal			10	?	?	disrupted
	11	disrupted	disrupted	disrupted			1	normal	normal	disrupted
	12	normal	normal	normal			2	disrupted	?	disrupted
	13	normal	disrupted	disrupted			3	normal	normal	normal
	14	?	normal	disrupted			4	normal	normal	normal
	15	normal	normal	normal			5	normal	normal	disrupted
	16	disrupted	disrupted	?			6	disrupted	?	disrupted
	17	disrupted	disrupted	disrupted			7	normal	normal	?
	18	normal	?	disrupted			8	normal	normal	normal
	19	?	normal	?			9	normal	normal	normal
	20	normal	normal	?
	21	?	disrupted	disrupted
												Exp #	fish #	NM3	NM4	NM5
												MH50	1	normal	normal	normal
													2	normal	normal	normal
													1	normal	normal	normal
													2	normal	?	?
													3	normal	normal	normal
													4	normal	normal	normal
													5	normal	normal	normal
Exp #	fish #	NM3	NM4	NM5		Exp #	fish #	NM3	NM4	NM5
MH52	1	disrupted	disrupted	disrupted		MH52	1	disrupted	?	?
	2	normal	normal	?			2	?	?	disrupted
	3	normal	?	disrupted			3	normal	normal	normal
	4	disrupted	disrupted	disrupted			4	disrupted	disrupted	normal
	5	disrupted	disrupted	disrupted			5	normal	normal	normal
	6	disrupted	disrupted	disrupted			6	normal	normal	normal
	7	normal	disrupted	disrupted			1	normal	normal	disrupted
	8	disrupted	disrupted	disrupted			2	normal	normal	normal
	9	normal	disrupted	disrupted			3	?	?	disrupted
	10	normal	normal	?			4	disrupted	disrupted	disrupted
	11	disrupted	disrupted	disrupted			5	disrupted	disrupted	disrupted
	12	normal	normal	disrupted			6	disrupted	disrupted	disrupted
	13	normal	normal	normal			7	?	?	normal
	14	normal	normal	?
	15	disrupted	disrupted	disrupted
	16	disrupted	disrupted	disrupted
	17	?	?	disrupted
	18	disrupted	disrupted	disrupted
	19	normal	disrupted	disrupted
	20	disrupted	disrupted	disrupted
Exp #	fish #	NM3	NM4	NM5								Exp #	fish #	NM3	NM4	NM5
MH57	1	normal	disrupted	disrupted								MH54	1	normal	normal	?
	2	normal	disrupted	disrupted									2	normal	normal	normal
	3	normal	normal	normal									3	normal	normal	normal
	4	normal	normal	?									4	normal	normal	normal
	5	normal	disrupted	disrupted									5	normal	normal	normal
	6	normal	normal	disrupted									6	normal	normal	?
	7	normal	normal	normal									7	normal	normal	normal
	8	normal	disrupted	?									8	normal	normal	normal
	9	normal	normal	?									9	normal	normal	normal
	10	normal	disrupted	disrupted									10	?	?	?
	11	normal	normal	?									11	normal	normal	normal
	12	normal	disrupted	disrupted									12	normal	normal	normal
	13	disrupted	disrupted	disrupted									13	normal	normal	normal
													1	?	normal	?
													2	normal	normal	normal
													3	normal	normal	normal
													4	normal	normal	normal
													5	normal	normal	normal
													6	normal	normal	normal
													7	normal	normal	normal
													8	?	?	?
													9	normal	normal	normal
													10	normal	normal	normal
													11	normal	normal	normal
