# Supplementary material for: Mechanical overstimulation causes acute injury and synapse loss followed by fast recovery in lateral-line neuromasts of larval zebrafish
Source: eLife. 2021 Oct 19;10:e69264. doi: 10.7554/eLife.69264 (PMC8555980; doi:10.7554/eLife.69264)
Supplement: Figure 7—source data 2. [file elife-69264-fig7-data2.xlsx]

## Sheet: Normal vs disrupted morphology
Experiment ID	Fish ID	Group ID	Neuromast/Position	# hair cells per NM	% hair cells innervated	# synapses/hair cell		n	1	53
MH07	F1	1	3	16	1				2	31
MH07	F1	1	4	13	1				3	31
MH07	F2	1	4	10	1				4	56
MH07	F2	1	5	12	1				5
MH07	F3	1	3	13	1				6
MH07	F3	1	4	13	1
MH25	F59	1	4	13	1
MH25	F60	1	4	7	1
MH25	F61	1	3	12	1
MH25	F62	1	4	10	1
MH25	F63	1	4	11	1
MH25	F75	1	4	11		3.54545
MH25	F76	1	5	11		2.54545
MH25	F77	1	3	11		2.27273
MH25	F78	1	3	10		4.3
MH25	F79	1	4	12		3
MH25	F80	1	3	13		3.15385
MH42	F142	1	4	11	1
MH42	F143	1	3	11	1
MH42	F144	1	4	10	1
MH42	F145	1	4	9	1
MH42	F146	1	4	8	1
MH42	F146	1	5	9	1
MH42	F147	1	4	12	1
MH42	F167	1	4	14		3.57143
MH42	F168	1	3	12		4
MH42	F169	1	5	12		3
MH42	F170	1	4	12		3.16667
MH42	F171	1	4	12		3
MH42	F172	1	5	13		4.07692
MH42	F173	1	5	13		2.61538
MH52	F232	1	4	12	1
MH52	F233	1	3	13	1
MH52	F233	1	4	14	1
MH52	F234	1	3	13	1
MH52	F234	1	4	15	1
MH52	F256	1	4	16		3.75
MH52	F257	1	4	15		3.4
MH52	F258	1	4	13		4.84615
MH52	F259	1	4	16		3.0625
MH52	F260	1	4	12		4.75
MH128	F530	1	5	11	1
MH128	F531	1	5	14	1
MH128	F532	1	4	14	1
MH128	F533	1	4	14	1
MH128	F534	1	4	16	1
MH128	F535	1	4	16	1
MH128	F536	1	3	16	1
MH143	F556	1	3	13		2.69231
MH143	F557	1	4	14		3.71429
MH143	F558	1	4	15		3.06667
MH143	F559	1	4	12		3.08333
MH143	F560	1	5	13		3.15385
MH07	F4	2	4	13	1
MH07	F6	2	4	16	1
MH07	F7	2	4	13	1
MH25	F65	2	3	10	1
MH25	F66	2	4	15	0.866667
MH25	F81	2	3	13		2.76923
MH25	F84	2	4	11		3.72727
MH42	F148	2	3	13	1
MH42	F148	2	4	11	1
MH42	F149	2	4	13	1
MH42	F150	2	4	10	1
MH42	F151	2	4	11	1
MH42	F174	2	4	10		2.7
MH42	F174	2	5	13		3.15385
MH42	F175	2	4	13		3.23077
MH52	F235	2	4	13	1
MH52	F235	2	4	14	1
MH52	F236	2	3	14	1
MH52	F240	2	3	13	1
MH52	F261	2	4	15		3.86667
MH52	F262	2	3	15		2.66667
MH128	F537	2	4	14	1
MH128	F538	2	4	16	1
MH128	F539	2	4	17	1
MH128	F540	2	5	15	1
MH128	F541	2	5	12	1
MH128	F542	2	3	14	1
MH143	F561	2	3	14		3.35714
MH143	F562	2	3	17		2.82353
MH143	F563	2	4	15		2.66667
MH143	F564	2	5	12		3.41667
MH07	F5	3	4	13	1
MH25	F64	3	4	6	0.833333
MH25	F64	3	3	7	0.857143
MH25	F65	3	5	9	1
MH25	F67	3	3	13	1
MH25	F67	3	4	12	0.916667
MH25	F67	3	5	9	0.666667
MH25	F81	3	4	9		3.66667
MH25	F81	3	5	13		3.15385
MH25	F82	3	3	9		3.33333
MH25	F83	3	3	9		3.66667
MH42	F152	3	5	10	0.9
MH42	F153	3	4	11	1
MH42	F153	3	5	9	0.888889
MH42	F154	3	4	10	0.9
MH42	F176	3	4	9		3.55556
MH42	F176	3	5	9		3.66667
MH42	F177	3	4	12		2.75
MH42	F178	3	5	9		3
MH42	F179	3	5	11		3.45455
MH52	F236	3	4	7	1
MH52	F237	3	4	14	0.785714
MH52	F238	3	4	13	0.923077
MH52	F239	3	4	12	1
MH52	F240	3	5	11	1
MH52	F263	3	5	9		3.22222
MH52	F264	3	4	12		3.58333
MH52	F265	3	3	15		4
MH52	F266	3	3	16		3.625
MH143	F565	3	4	16		2.125
MH143	F566	3	5	10		3
MH07	F8	4	4	12	1
MH07	F8	4	5	12	1
MH07	F9	4	3	10	1
MH07	F9	4	4	10	1
MH07	F10	4	4	14	1
MH07	F10	4	5	11	1
MH07	F11	4	4	12	1
MH25	F68	4	3	10	1
MH25	F69	4	3	13	1
MH25	F70	4	3	10	1
MH25	F71	4	3	12	1
MH25	F71	4	4	13	1
MH25	F72	4	4	12	1
MH25	F85	4	3	10		3.7
MH25	F86	4	3	9		3.66667
MH25	F87	4	3	13		2.76923
MH25	F88	4	3	10		4.4
MH25	F89	4	3	9		1.55556
MH42	F155	4	4	9	1
MH42	F156	4	5	9	1
MH42	F157	4	4	12	1
MH42	F158	4	4	11	1
MH42	F159	4	4	11	1
MH42	F160	4	3	10	1
MH42	F161	4	3	11	1
MH42	F180	4	3	12		2.33333
MH42	F181	4	4	9		3.11111
MH42	F182	4	4	10		3.6
MH42	F183	4	3	11		3.54545
MH42	F184	4	3	10		0
MH42	F184	4	5	11		3.54545
MH42	F185	4	3	11		1.90909
MH52	F241	4	3	13	1
MH52	F241	4	4	15	1
MH52	F242	4	4	13	1
MH52	F243	4	4	11	1
MH52	F243	4	5	13	1
MH52	F267	4	5	10		2.4
MH52	F268	4	3	14		2.71429
MH52	F268	4	4	13		3.53846
MH52	F269	4	4	13		2.46154
MH52	F269	4	5	14		2.42857
MH128	F543	4	5	14	1	2.57143
MH128	F544	4	5	15	1	3.06667
MH128	F545	4	4	13	1	2.30769
MH128	F546	4	3	14	1	2.85714
MH128	F547	4	4	16	1	2.4375
MH128	F548	4	3	16	1	2.875
MH143	F567	4	3	14		3.57143
MH143	F568	4	3	13		3.30769
MH143	F568	4	5	14		3.21429
MH143	F569	4	4	12		3.41667
MH143	F570	4	3	14		3.85714
MH143	F570	4	4	14		3.64286
MH143	F571	4	4	14		3
MH143	F571	4	3	14		3.28571
MH07	F13	5	3	11	1
MH07	F13	5	5	12	1
MH25	F73	5	5	8	1
MH25	F74	5	4	11	1
MH25	F74	5	3	12	1
MH25	F90	5	3	11		2.09091
MH25	F91	5	3	11		2.72727
MH25	F91	5	4	10		3.3
MH25	F92	5	3	12		4.41667
MH25	F93	5	3	11		2.45455
MH25	F94	5	3	11		3.90909
MH25	F95	5	3	11		2.81818
MH42	F162	5	5	10	1
MH42	F163	5	4	13	1
MH42	F164	5	3	13	1
MH42	F186	5	4	12		2.75
MH42	F187	5	4	10		3
MH42	F188	5	3	10		2.1
MH42	F189	5	4	8		2.625
MH42	F190	5	3	10		3.3
MH52	F244	5	3	10	1
MH52	F245	5	5	13	1
MH52	F246	5	4	13	1
MH52	F246	5	5	11	1
MH52	F270	5	3	17		2.64706
MH52	F270	5	4	16		2.375
MH52	F273	5	3	14		1.92857
MH128	F549	5	4	15	0.933333	2.6
MH128	F550	5	4	13	1	2.07692
MH128	F551	5	5	12	1	2.75
MH128	F552	5	3	16	1	2.1875
MH128	F553	5	4	15	1	2.6
MH128	F554	5	4	11	1	2.72727
MH143	F572	5	3	15		2.33333
MH143	F573	5	5	14		2.78571
MH143	F574	5	5	14		3.71429
MH143	F575	5	3	17		3.41176
MH143	F575	5	4	15		2.86667
MH07	F12	6	3	5	1
MH07	F12	6	4	8	1
MH07	F12	6	5	7	1
MH07	F13	6	4	13	0.846154
MH25	F73	6	3	11	0.909091
MH25	F73	6	4	10	0.8
MH25	F93	6	5	9		2.66667
MH42	F162	6	4	8	1
MH42	F165	6	3	12	1
MH42	F166	6	5	6	0.833333
MH42	F191	6	4	10		3.2
MH42	F192	6	5	10		2.9
MH52	F245	6	4	13	0.923077
MH52	F247	6	4	6	1
MH52	F248	6	3	11	0.909091
MH52	F249	6	4	10	1
MH52	F271	6	4	13		3.07692
MH52	F272	6	5	9		2.55556
MH52	F273	6	5	12		2.75
MH52	F274	6	4	13		2
MH52	F275	6	4	13		3.46154
MH52	F275	6	5	12		4.08333
MH128	F555	6	5	12	1	2.83333
MH143	F576	6	4	9		2.66667
MH143	F576	6	5	11		3.27273

## Sheet: Group "dictionary"
Group #	Group description
1	WT, control, no recovery
2	WT, exposed, normal morphology, no recovery
3	WT, exposed, disrupted morphology, no recovery
4	WT, control, 2h recovery
5	WT, exposed, normal morphology, 2h recovery
6	WT, exposed, disrupted morphology, 2h recovery

## Sheet: Analysis
											Tukey's adjustment was used to preserve the alpha error for multiple comparisons.
hair cell											Highlighted are all statistically significant differences
Type 3 Tests of Fixed Effects
Effect	Num DF	Den DF	F Value	Pr > F
GroupID	5	209	7.66	<.0001
Least Squares Means
Effect	Group ID	Estimate	Standard	DF	t Value	Pr > |t|	Alpha	Lower	Upper
			Error
GroupID	1	12.5181	0.3117	189	40.16	<.0001	0.05	11.9033	13.1329
GroupID	2	13.5737	0.3915	222	34.67	<.0001	0.05	12.8022	14.3453
GroupID	3	10.9656	0.406	220	27.01	<.0001	0.05	10.1655	11.7657
GroupID	4	11.935	0.3167	175	37.68	<.0001	0.05	11.3099	12.5601
GroupID	5	12.0306	0.3618	216	33.26	<.0001	0.05	11.3176	12.7437
GroupID	6	10.6703	0.4413	228	24.18	<.0001	0.05	9.8006	11.5399
Differences of Least Squares Means							these p-values are unadjusted		adjusted p-values
Effect	Group ID	Group ID	Estimate	Standard	DF	t Value	Pr > |t|	Adjustment	Adj P	Alpha	Lower	Upper	Adj Lower	Adj Upper
				Error
GroupID	1	2	-1.0556	0.5004	211	-2.11	0.0361	Tukey-Kramer	0.2865	0.05	-2.042	-0.06915	-2.495	0.3838
GroupID	1	3	1.5525	0.5118	210	3.03	0.0027	Tukey-Kramer	0.0321	0.05	0.5436	2.5615	0.08033	3.0247
GroupID	1	4	0.5831	0.4444	182	1.31	0.1911	Tukey-Kramer	0.778	0.05	-0.2936	1.4599	-0.695	1.8613
GroupID	1	5	0.4875	0.4775	206	1.02	0.3085	Tukey-Kramer	0.9105	0.05	-0.4539	1.4289	-0.886	1.861
GroupID	1	6	1.8479	0.5403	223	3.42	0.0007	Tukey-Kramer	0.0097	0.05	0.7831	2.9126	0.2938	3.4019
GroupID	2	3	2.6081	0.5224	210	4.99	<.0001	Tukey-Kramer	<.0001	0.05	1.5783	3.638	1.1055	4.1108
GroupID	2	4	1.6387	0.5036	207	3.25	0.0013	Tukey-Kramer	0.0165	0.05	0.6459	2.6316	0.1902	3.0873
GroupID	2	5	1.5431	0.5331	219	2.89	0.0042	Tukey-Kramer	0.0475	0.05	0.4925	2.5936	0.0098	3.0764
GroupID	2	6	2.9034	0.59	227	4.92	<.0001	Tukey-Kramer	<.0001	0.05	1.7409	4.066	1.2065	4.6004
GroupID	3	4	-0.9694	0.5149	206	-1.88	0.0612	Tukey-Kramer	0.4158	0.05	-1.9846	0.04582	-2.4505	0.5117
GroupID	3	5	-1.065	0.5438	218	-1.96	0.0514	Tukey-Kramer	0.3698	0.05	-2.1368	0.006687	-2.6292	0.4991
GroupID	3	6	0.2953	0.5997	226	0.49	0.6229	Tukey-Kramer	0.9964	0.05	-0.8863	1.477	-1.4296	2.0202
GroupID	4	5	-0.09566	0.4808	201	-0.2	0.8425	Tukey-Kramer	1	0.05	-1.0438	0.8525	-1.4787	1.2874
GroupID	4	6	1.2647	0.5432	220	2.33	0.0208	Tukey-Kramer	0.1875	0.05	0.1941	2.3353	-0.2978	2.8273
GroupID	5	6	1.3604	0.5068	166	2.68	0.008	Tukey-Kramer	0.0827	0.05	0.3598	2.361	-0.09736	2.8181
haircell innervated
Type 3 Tests of Fixed Effects
Effect	Num DF	Den DF	F Value	Pr > F
GroupID	5	123	12.05	<.0001
Least Squares Means
Effect	Group ID	Estimate	Standard	DF	t Value	Pr > |t|	Alpha	Lower	Upper
			Error
GroupID	1	100	0.7924	123	126.19	<.0001	0.05	98.4314	101.57
GroupID	2	99.3333	0.9705	123	102.35	<.0001	0.05	97.4122	101.25
GroupID	3	91.6968	1.0851	123	84.51	<.0001	0.05	89.5489	93.8447
GroupID	4	100	0.7796	123	128.28	<.0001	0.05	98.4569	101.54
GroupID	5	99.6296	1.023	123	97.39	<.0001	0.05	97.6046	101.65
GroupID	6	94.4339	1.16	123	81.41	<.0001	0.05	92.1377	96.7301
Differences of Least Squares Means
Effect	Group ID	Group ID	Estimate	Standard	DF	t Value	Pr > |t|	Adjustment	Adj P	Alpha	Lower	Upper	Adj Lower	Adj Upper
				Error
GroupID	1	2	0.6667	1.253	123	0.53	0.5956	Tukey-Kramer	0.9948	0.05	-1.8135	3.1468	-2.9608	4.2942
GroupID	1	3	8.3032	1.3437	123	6.18	<.0001	Tukey-Kramer	<.0001	0.05	5.6435	10.9629	4.4131	12.1933
GroupID	1	4	-3.55e-15	1.1116	123	0	1	Tukey-Kramer	1	0.05	-2.2004	2.2004	-3.2183	3.2183
GroupID	1	5	0.3704	1.2941	123	0.29	0.7752	Tukey-Kramer	0.9997	0.05	-2.1911	2.9319	-3.3761	4.1168
GroupID	1	6	5.5661	1.4048	123	3.96	0.0001	Tukey-Kramer	0.0017	0.05	2.7853	8.3469	1.4988	9.6334
GroupID	2	3	7.6365	1.4558	123	5.25	<.0001	Tukey-Kramer	<.0001	0.05	4.7548	10.5182	3.4217	11.8513
GroupID	2	4	-0.6667	1.2449	123	-0.54	0.5932	Tukey-Kramer	0.9946	0.05	-3.1308	1.7974	-4.2707	2.9374
GroupID	2	5	-0.2963	1.4102	123	-0.21	0.8339	Tukey-Kramer	0.9999	0.05	-3.0876	2.495	-4.3789	3.7863
GroupID	2	6	4.8994	1.5125	123	3.24	0.0015	Tukey-Kramer	0.0188	0.05	1.9056	7.8933	0.5206	9.2783
GroupID	3	4	-8.3032	1.3361	123	-6.21	<.0001	Tukey-Kramer	<.0001	0.05	-10.9479	-5.6585	-12.1714	-4.435
GroupID	3	5	-7.9328	1.4913	123	-5.32	<.0001	Tukey-Kramer	<.0001	0.05	-10.8848	-4.9808	-12.2504	-3.6152
GroupID	3	6	-2.7371	1.5884	123	-1.72	0.0874	Tukey-Kramer	0.5193	0.05	-5.8813	0.4071	-7.3358	1.8616
GroupID	4	5	0.3704	1.2862	123	0.29	0.7739	Tukey-Kramer	0.9997	0.05	-2.1756	2.9163	-3.3534	4.0941
GroupID	4	6	5.5661	1.3976	123	3.98	0.0001	Tukey-Kramer	0.0016	0.05	2.7996	8.3326	1.5198	9.6124
GroupID	5	6	5.1957	1.5467	123	3.36	0.001	Tukey-Kramer	0.013	0.05	2.1342	8.2573	0.7178	9.6736
SYNAPSE
Type 3 Tests of Fixed Effects
Effect	Num DF	Den DF	F Value	Pr > F
GroupID	5	96.3	2.79	0.0212
Least Squares Means
Effect	Group ID	Estimate	Standard	DF	t Value	Pr > |t|	Alpha	Lower	Upper
			Error
GroupID	1	3.3812	0.1358	112	24.89	<.0001	0.05	3.1121	3.6503
GroupID	2	3.1257	0.1967	102	15.89	<.0001	0.05	2.7355	3.5158
GroupID	3	3.3201	0.1686	94.1	19.69	<.0001	0.05	2.9854	3.6549
GroupID	4	2.9385	0.1174	79.4	25.03	<.0001	0.05	2.7049	3.1722
GroupID	5	2.7882	0.128	97.3	21.78	<.0001	0.05	2.5341	3.0423
GroupID	6	2.9549	0.1886	86.3	15.67	<.0001	0.05	2.5799	3.3298
Differences of Least Squares Means
Effect	Group ID	Group ID	Estimate	Standard	DF	t Value	Pr > |t|	Adjustment	Adj P	Alpha	Lower	Upper	Adj Lower	Adj Upper
				Error
GroupID	1	2	0.2555	0.2391	107	1.07	0.2876	Tukey-Kramer	0.8925	0.05	-0.2184	0.7294	-0.4396	0.9507
GroupID	1	3	0.06104	0.2165	104	0.28	0.7786	Tukey-Kramer	0.9998	0.05	-0.3683	0.4904	-0.5685	0.6906
GroupID	1	4	0.4426	0.1795	103	2.47	0.0153	Tukey-Kramer	0.1449	0.05	0.08656	0.7987	-0.07945	0.9647
GroupID	1	5	0.593	0.1866	108	3.18	0.0019	Tukey-Kramer	0.0238	0.05	0.223	0.9629	0.05021	1.1357
GroupID	1	6	0.4263	0.2324	98.5	1.83	0.0697	Tukey-Kramer	0.4491	0.05	-0.03491	0.8875	-0.2496	1.1022
GroupID	2	3	-0.1945	0.2587	111	-0.75	0.4538	Tukey-Kramer	0.9747	0.05	-0.7072	0.3182	-0.9468	0.5578
GroupID	2	4	0.1871	0.2291	96.9	0.82	0.4161	Tukey-Kramer	0.9638	0.05	-0.2676	0.6418	-0.4791	0.8533
GroupID	2	5	0.3374	0.2347	101	1.44	0.1536	Tukey-Kramer	0.7041	0.05	-0.1282	0.8031	-0.3451	1.02
GroupID	2	6	0.1708	0.2725	95.1	0.63	0.5324	Tukey-Kramer	0.9888	0.05	-0.3703	0.7119	-0.6217	0.9633
GroupID	3	4	0.3816	0.2055	89.4	1.86	0.0666	Tukey-Kramer	0.4346	0.05	-0.02662	0.7898	-0.2158	0.979
GroupID	3	5	0.5319	0.2117	95.3	2.51	0.0137	Tukey-Kramer	0.1306	0.05	0.1117	0.9522	-0.08366	1.1475
GroupID	3	6	0.3653	0.253	89.8	1.44	0.1523	Tukey-Kramer	0.7002	0.05	-0.1373	0.8679	-0.3704	1.1009
GroupID	4	5	0.1503	0.1737	89.3	0.87	0.3891	Tukey-Kramer	0.9538	0.05	-0.1948	0.4955	-0.3548	0.6555
GroupID	4	6	-0.01631	0.2222	84.3	-0.07	0.9417	Tukey-Kramer	1	0.05	-0.4581	0.4255	-0.6624	0.6298
GroupID	5	6	-0.1666	0.2277	101	-0.73	0.466	Tukey-Kramer	0.9775	0.05	-0.6184	0.2851	-0.8289	0.4956
