# Supplementary material for: Mechanical overstimulation causes acute injury and synapse loss followed by fast recovery in lateral-line neuromasts of larval zebrafish
Source: eLife. 2021 Oct 19;10:e69264. doi: 10.7554/eLife.69264 (PMC8555980; doi:10.7554/eLife.69264)
Supplement: Figure 7—source data 3. [file elife-69264-fig7-data3.xlsx]

## Sheet: Normal vs disrupted morphology
Experiment ID	Fish ID	Group ID	Neuromast/Position	# hair cells per NM	% hair cells innervated	# synapses/hair cell			1	WT, control, no recovery
MH28	F96	1	4	9	1				2	WT, exposed, normal morphology, no recovery
MH28	F97	1	4	13	1				3	WT, exposed, disrupted morphology, no recovery
MH28	F98	1	4	12	1
MH28	F99	1	5	13	1
MH28	F100	1	3	15	1
MH28	F101	1	3	13	1
MH28	F102	1	4	12	1
MH28	F103	2	4	13	1
MH28	F104	2	3	12	1
MH28	F104	3	4	13	1
MH28	F105	2	3	13	1
MH28	F106	3	3	10	0.8
MH28	F106	3	4	11	0.909091
MH28	F107	3	5	8	1
MH28	F108	3	4	10	1
MH28	F108	2	5	9	1
MH28	F109	7	4	8	1
MH28	F110	7	4	10	1
MH28	F111	7	4	12	1
MH28	F112	7	5	11	1
MH28	F113	7	3	8	1
MH28	F114	9	3	10	1
MH28	F115	9	3	8	1
MH28	F115	9	5	7	1
MH28	F116	9	3	10	1
MH28	F117	9	4	10	1
MH28	F117	8	5	11	1
MH28	F118	1	5	11		2.81818
MH28	F119	1	5	11		2.09091
MH28	F120	1	3	10		1.8
MH28	F121	1	4	10		3.6
MH28	F122	1	5	10		1.3
MH28	F123	1	3	12		2.58333
MH28	F124	1	5	11		1
MH28	F125	3	5	13		3.23077
MH28	F125	3	4	13		0.538462
MH28	F126	3	3	13		1.30769
MH28	F127	2	3	13		1.61538
MH28	F128	2	3	9		2.44444
MH28	F128	3	5	13		0.0769231
MH28	F129	2	4	11		2.18182
MH28	F129	3	5	11		1.81818
MH28	F130	7	4	12		3.33333
MH28	F131	7	3	12		3
MH28	F132	7	5	11		3.09091
MH28	F133	7	5	9		2.77778
MH28	F134	7	3	12		2.91667
MH28	F135	7	5	12		2.83333
MH28	F136	8	5	13		2.69231
MH28	F137	8	4	9		2.22222
MH28	F138	8	4	9		2
MH28	F139	8	3	11		2.90909
MH28	F140	8	4	11		2.90909
MH28	F140	9	4	6		4.33333
MH28	F141	9	3	6		3.33333
MH42	F142	1	4	11	1
MH42	F143	1	3	11	1
MH42	F144	1	4	10	1
MH42	F145	1	4	9	1
MH42	F146	1	4	8	1
MH42	F146	1	5	9	1
MH42	F147	1	4	12	1
MH42	F148	2	3	13	1
MH42	F148	2	4	11	1
MH42	F149	2	4	13	1
MH42	F150	2	4	10	1
MH42	F151	2	4	11	1
MH42	F152	3	5	10	0.9
MH42	F153	3	4	11	1
MH42	F153	3	5	9	0.888889
MH42	F154	3	4	10	0.9
MH42	F167	1	4	14		3.57143
MH42	F168	1	3	12		4
MH42	F169	1	5	12		3
MH42	F170	1	4	12		3.16667
MH42	F171	1	4	12		3
MH42	F172	1	5	13		4.07692
MH42	F173	1	5	13		2.61538
MH42	F174	2	4	10		2.7
MH42	F174	2	5	13		3.15385
MH42	F175	2	4	13		3.23077
MH42	F176	3	4	9		3.55556
MH42	F176	3	5	9		3.66667
MH42	F177	3	4	12		2.75
MH42	F178	3	5	9		3
MH42	F179	3	5	11		3.45455
MH42	F193	7	3	11	1
MH42	F194	7	5	9	1
MH42	F195	7	3	13	1
MH42	F196	7	5	9	1
MH42	F197	7	3	12	1
MH42	F198	7	4	10	1
MH42	F199	7	4	9	1
MH42	F200	8	5	9	1
MH42	F201	8	3	9	1
MH42	F201	8	4	8	1
MH42	F202	8	4	11	1
MH42	F203	8	5	8	1
MH42	F204	8	3	9	1
MH42	F205	7	3	11		3.54545
MH42	F206	7	5	9		2.88889
MH42	F207	7	4	12		2.83333
MH42	F208	7	4	13		3.61538
MH42	F209	7	4	12		2.5
MH42	F210	7	4	13		3.30769
MH42	F211	8	4	11
MH42	F212	8	5	11		3.18182
MH42	F213	8	5	9		3.22222
MH42	F214	8	3	8
MH42	F215	8	4	8
MH42	F216	8	3	9
MH42	F217	8	4	8
MH50	F218	7	4	11	1
MH50	F218	7	5	11	1
MH50	F219	7	4	7	1
MH50	F220	7	3	11	1
MH50	F221	8	4	9	1
MH50	F222	8	3	11	1
MH50	F222	8	4	9	1
MH50	F223	7	4	8		3
MH50	F224	7	4	13		2.30769
MH50	F225	7	5	11		2.81818
MH50	F226	7	4	9		2.88889
MH50	F227	8	4	11		3.36364
MH50	F228	8	4	10		3.4
MH50	F229	8	4	11		3
MH50	F230	8	4	11		3.72727
MH50	F231	8	4	9		2.55556
MH52	F232	1	4	12	1
MH52	F233	1	3	13	1
MH52	F233	1	4	14	1
MH52	F234	1	3	13	1
MH52	F234	1	4	15	1
MH52	F235	2	4	13	1
MH52	F235	2	4	14	1
MH52	F236	2	3	14	1
MH52	F236	3	4	7	1
MH52	F237	3	4	14	0.785714
MH52	F238	3	4	13	0.923077
MH52	F239	3	4	12	1
MH52	F240	2	3	13	1
MH52	F240	3	5	11	1
MH52	F250	7	4	10	1
MH52	F250	7	5	11	1
MH52	F251	7	3	11	1
MH52	F252	7	4	11	1
MH52	F253	8	3	13	1
MH52	F253	8	4	13	1
MH52	F254	8	3	9	1
MH52	F254	8	5	9	1
MH52	F255	8	3	10	1
MH52	F255	8	4	8	1
MH52	F256	1	4	16		3.75
MH52	F257	1	4	15		3.4
MH52	F258	1	4	13		4.84615
MH52	F259	1	4	16		3.0625
MH52	F260	1	4	12		4.75
MH52	F261	2	4	15		3.86667
MH52	F262	2	3	15		2.66667
MH52	F263	3	5	9		3.22222
MH52	F264	3	4	12		3.58333
MH52	F265	3	3	15		4
MH52	F266	3	3	16		3.625
MH52	F276	7	3	11		3.72727
MH52	F277	7	5	11		3.54545
MH52	F278	7	4	12		2.83333
MH52	F279	7	4	13		3.30769
MH52	F280	7	4	11
MH52	F281	8	4	10		2.2
MH52	F282	8	5	11		3.18182
MH52	F283	8	3	12		3.33333
MH52	F284	8	4	12		2.41667
MH52	F285	8	5	9		2.33333
MH52	F285	8	3	12

## Sheet: Group "dictionary"
Group #	Group description
1	WT, control, no recovery
2	WT, exposed, normal morphology, no recovery
3	WT, exposed, disrupted morphology, no recovery
7	WT, control, 48h recovery
8	WT, exposed, normal morphology, 48h recovery
9	WT, exposed, disrupted morphology, 48h recovery

## Sheet: Analysis
6 independent groups
Haircell
Type 3 Tests of Fixed Effects
Effect	Num DF	Den DF	F Value	Pr > F
GroupID	5	159	10.58	<.0001
Least Squares Means
Effect	Group ID	Estimate	Standard	DF	t Value	Pr > |t|	Alpha	Lower	Upper
			Error
GroupID	1	12.0818	0.2935	154	41.17	<.0001	0.05	11.502	12.6616
GroupID	2	12.3017	0.3967	161	31.01	<.0001	0.05	11.5182	13.0852
GroupID	3	11.3119	0.3447	156	32.82	<.0001	0.05	10.631	11.9928
GroupID	7	10.7812	0.2806	158	38.42	<.0001	0.05	10.2269	11.3354
GroupID	8	10.0336	0.2943	143	34.09	<.0001	0.05	9.4519	10.6154
GroupID	9	8.0935	0.6856	164	11.81	<.0001	0.05	6.7398	9.4471
Differences of Least Squares Means
Effect	Group ID	Group ID	Estimate	Standard	DF	t Value	Pr > |t|	Adjustment	Adj P	Alpha	Lower	Upper	Adj Lower	Adj Upper
				Error
GroupID	1	2	-0.2199	0.4935	159	-0.45	0.6564	Tukey-Kramer	0.9977	0.05	-1.1946	0.7547	-1.6436	1.2037
GroupID	1	3	0.7699	0.4527	155	1.7	0.091	Tukey-Kramer	0.5334	0.05	-0.1244	1.6641	-0.5361	2.0758
GroupID	1	7	1.3006	0.4061	156	3.2	0.0016	Tukey-Kramer	0.0201	0.05	0.4986	2.1027	0.1293	2.472
GroupID	1	8	2.0482	0.4156	148	4.93	<.0001	Tukey-Kramer	<.0001	0.05	1.2269	2.8694	0.8492	3.2471
GroupID	1	9	3.9883	0.7457	163	5.35	<.0001	Tukey-Kramer	<.0001	0.05	2.5158	5.4608	1.837	6.1396
GroupID	2	3	0.9898	0.5046	154	1.96	0.0516	Tukey-Kramer	0.3692	0.05	-0.00708	1.9867	-0.466	2.4456
GroupID	2	7	1.5206	0.486	160	3.13	0.0021	Tukey-Kramer	0.025	0.05	0.5609	2.4803	0.1187	2.9224
GroupID	2	8	2.2681	0.494	156	4.59	<.0001	Tukey-Kramer	0.0001	0.05	1.2923	3.2439	0.8431	3.6931
GroupID	2	9	4.2083	0.7921	164	5.31	<.0001	Tukey-Kramer	<.0001	0.05	2.6442	5.7723	1.9233	6.4932
GroupID	3	7	0.5308	0.4445	157	1.19	0.2342	Tukey-Kramer	0.8391	0.05	-0.3472	1.4087	-0.7514	1.813
GroupID	3	8	1.2783	0.4532	150	2.82	0.0054	Tukey-Kramer	0.0594	0.05	0.3828	2.1738	-0.02916	2.5857
GroupID	3	9	3.2185	0.7673	163	4.19	<.0001	Tukey-Kramer	0.0006	0.05	1.7033	4.7336	1.0049	5.432
GroupID	7	8	0.7475	0.4066	151	1.84	0.068	Tukey-Kramer	0.4443	0.05	-0.05591	1.551	-0.4255	1.9206
GroupID	7	9	2.6877	0.7408	164	3.63	0.0004	Tukey-Kramer	0.0051	0.05	1.225	4.1504	0.5507	4.8246
GroupID	8	9	1.9402	0.7354	168	2.64	0.0091	Tukey-Kramer	0.0942	0.05	0.4883	3.3921	-0.1814	4.0618
Haircell Innervated
Type 3 Tests of Fixed Effects
Effect	Num DF	Den DF	F Value	Pr > F
GroupID	5	64.5	9.68	<.0001
Least Squares Means
Effect	Group ID	Estimate	Standard	DF	t Value	Pr > |t|	Alpha	Lower	Upper
			Error
GroupID	1	100	0.7102	65.7	140.8	<.0001	0.05	98.5818	101.42
GroupID	2	99.8216	0.8576	69.1	116.4	<.0001	0.05	98.1108	101.53
GroupID	3	93.7181	0.8257	70.1	113.5	<.0001	0.05	92.0714	95.3648
GroupID	7	100	0.6889	72.7	145.16	<.0001	0.05	98.6269	101.37
GroupID	8	100	0.7841	46	127.54	<.0001	0.05	98.4218	101.58
GroupID	9	100	1.3884	62.7	72.03	<.0001	0.05	97.2253	102.77
Differences of Least Squares Means
Effect	Group ID	Group ID	Estimate	Standard	DF	t Value	Pr > |t|	Adjustment	Adj P	Alpha	Lower	Upper	Adj Lower	Adj Upper
				Error
GroupID	1	2	0.1784	1.1135	67.7	0.16	0.8732	Tukey-Kramer	1	0.05	-2.0436	2.4005	-3.092	3.4489
GroupID	1	3	6.2819	1.0891	68.3	5.77	<.0001	Tukey-Kramer	<.0001	0.05	4.1087	8.455	3.083	9.4807
GroupID	1	7	-2.32e-14	0.9894	69.2	0	1	Tukey-Kramer	1	0.05	-1.9738	1.9738	-2.9061	2.9061
GroupID	1	8	-2.31e-14	1.0579	54.5	0	1	Tukey-Kramer	1	0.05	-2.1205	2.1205	-3.1073	3.1073
GroupID	1	9	5.59e-13	1.5595	63.3	0	1	Tukey-Kramer	1	0.05	-3.116	3.116	-4.5804	4.5804
GroupID	2	3	6.1034	1.1741	80.7	5.2	<.0001	Tukey-Kramer	<.0001	0.05	3.7673	8.4396	2.655	9.5518
GroupID	2	7	-0.1784	1.1	70.5	-0.16	0.8716	Tukey-Kramer	1	0.05	-2.372	2.0151	-3.4093	3.0524
GroupID	2	8	-0.1784	1.162	58.4	-0.15	0.8785	Tukey-Kramer	1	0.05	-2.5041	2.1472	-3.5913	3.2344
GroupID	2	9	-0.1784	1.6318	64.5	-0.11	0.9133	Tukey-Kramer	1	0.05	-3.4379	3.0811	-4.9714	4.6145
GroupID	3	7	-6.2819	1.0753	71.2	-5.84	<.0001	Tukey-Kramer	<.0001	0.05	-8.4259	-4.1378	-9.4402	-3.1235
GroupID	3	8	-6.2819	1.1387	58.5	-5.52	<.0001	Tukey-Kramer	<.0001	0.05	-8.5607	-4.003	-9.6262	-2.9375
GroupID	3	9	-6.2819	1.6153	64.7	-3.89	0.0002	Tukey-Kramer	0.0032	0.05	-9.5082	-3.0556	-11.0263	-1.5375
GroupID	7	8	9.13e-17	1.0437	57.5	0	1	Tukey-Kramer	1	0.05	-2.0896	2.0896	-3.0655	3.0655
GroupID	7	9	5.82e-13	1.5499	64.8	0	1	Tukey-Kramer	1	0.05	-3.0955	3.0955	-4.5522	4.5522
GroupID	8	9	5.82e-13	1.5873	66.5	0	1	Tukey-Kramer	1	0.05	-3.1686	3.1686	-4.662	4.662
Synapse
Type 3 Tests of Fixed Effects
Effect	Num DF	Den DF	F Value	Pr > F
GroupID	5	72.1	0.96	0.4467
Least Squares Means
Effect	Group ID	Estimate	Standard	DF	t Value	Pr > |t|	Alpha	Lower	Upper
			Error
GroupID	1	3.0753	0.1895	73.9	16.23	<.0001	0.05	2.6977	3.453
GroupID	2	2.7741	0.2952	68.6	9.4	<.0001	0.05	2.1851	3.3631
GroupID	3	2.7051	0.2237	65.4	12.09	<.0001	0.05	2.2584	3.1518
GroupID	7	3.0536	0.1847	73.9	16.53	<.0001	0.05	2.6855	3.4216
GroupID	8	2.8586	0.2003	74	14.27	<.0001	0.05	2.4594	3.2578
GroupID	9	3.8334	0.5826	72.9	6.58	<.0001	0.05	2.6722	4.9946
Differences of Least Squares Means
Effect	Group ID	Group ID	Estimate	Standard	DF	t Value	Pr > |t|	Adjustment	Adj P	Alpha	Lower	Upper	Adj Lower	Adj Upper
				Error
GroupID	1	2	0.3012	0.3508	70.9	0.86	0.3934	Tukey-Kramer	0.955	0.05	-0.3983	1.0008	-0.7259	1.3284
GroupID	1	3	0.3702	0.2932	70.5	1.26	0.2109	Tukey-Kramer	0.804	0.05	-0.2145	0.9549	-0.4882	1.2286
GroupID	1	7	0.02178	0.2647	73.9	0.08	0.9346	Tukey-Kramer	1	0.05	-0.5056	0.5491	-0.7531	0.7966
GroupID	1	8	0.2168	0.2758	73.9	0.79	0.4344	Tukey-Kramer	0.9691	0.05	-0.3327	0.7662	-0.5906	1.0242
GroupID	1	9	-0.7581	0.6127	73.2	-1.24	0.2199	Tukey-Kramer	0.817	0.05	-1.9791	0.4629	-2.5519	1.0357
GroupID	2	3	0.06897	0.3667	74	0.19	0.8513	Tukey-Kramer	1	0.05	-0.6618	0.7997	-1.0048	1.1427
GroupID	2	7	-0.2795	0.3483	70.9	-0.8	0.425	Tukey-Kramer	0.9662	0.05	-0.9739	0.415	-1.2991	0.7402
GroupID	2	8	-0.08449	0.3568	71.2	-0.24	0.8135	Tukey-Kramer	0.9999	0.05	-0.7959	0.6269	-1.1291	0.9601
GroupID	2	9	-1.0593	0.6532	73.9	-1.62	0.1091	Tukey-Kramer	0.5871	0.05	-2.3608	0.2422	-2.9717	0.853
GroupID	3	7	-0.3484	0.2901	70.3	-1.2	0.2338	Tukey-Kramer	0.835	0.05	-0.927	0.2301	-1.1978	0.501
GroupID	3	8	-0.1535	0.3003	70.8	-0.51	0.6109	Tukey-Kramer	0.9956	0.05	-0.7522	0.4453	-1.0327	0.7257
GroupID	3	9	-1.1283	0.6241	73.7	-1.81	0.0747	Tukey-Kramer	0.4673	0.05	-2.3719	0.1153	-2.9555	0.6989
GroupID	7	8	0.195	0.2725	73.9	0.72	0.4765	Tukey-Kramer	0.9795	0.05	-0.348	0.7379	-0.6028	0.9928
GroupID	7	9	-0.7799	0.6112	73.2	-1.28	0.206	Tukey-Kramer	0.797	0.05	-1.998	0.4382	-2.5694	1.0096
GroupID	8	9	-0.9748	0.6127	68.9	-1.59	0.1162	Tukey-Kramer	0.607	0.05	-2.1971	0.2474	-2.7686	0.8189
