# Supplementary figures and images for: Mechanical overstimulation causes acute injury and synapse loss followed by fast recovery in lateral-line neuromasts of larval zebrafish
Source: eLife journal article supplement (doi:10.7554/elife.69264), 2021-10-19

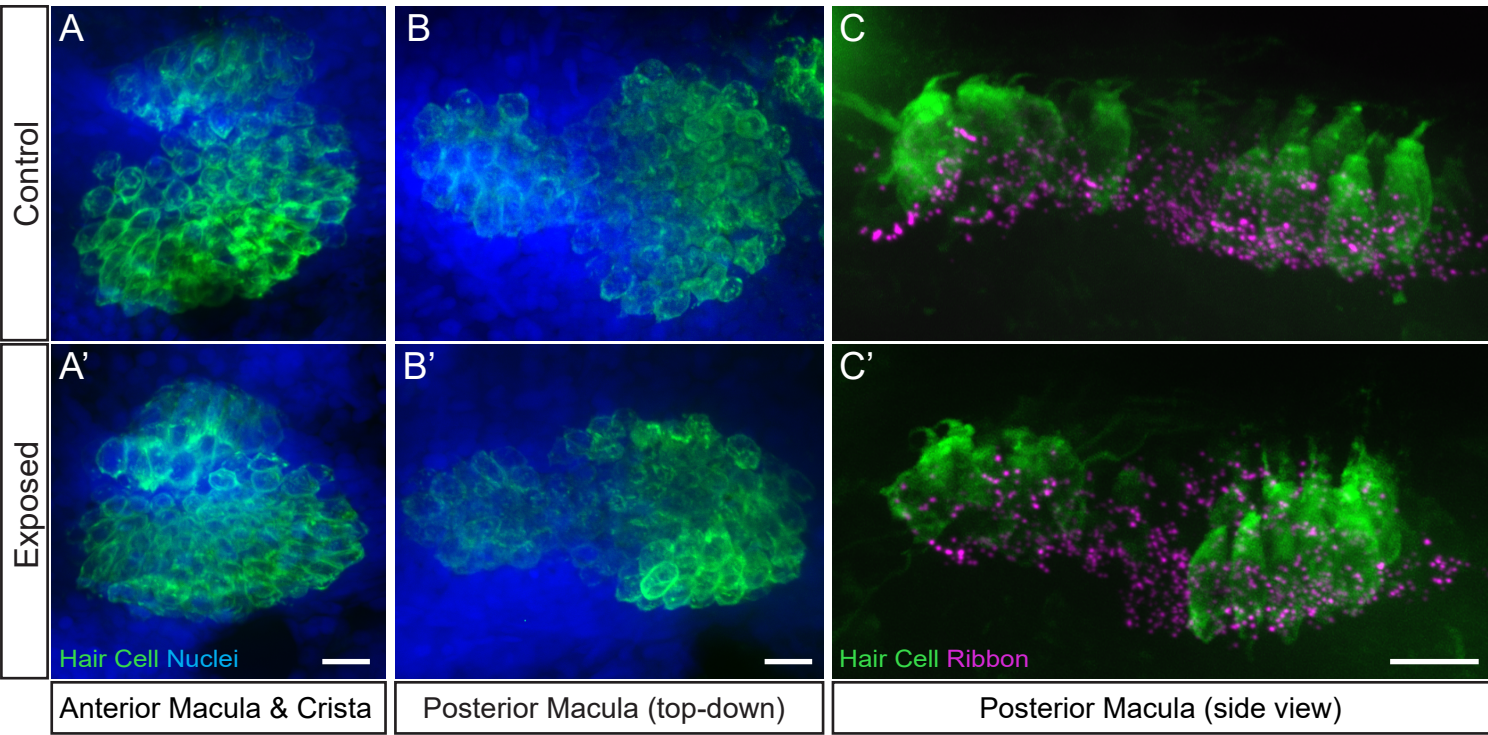

Supplement: supp [file elife-69264-supp-v1.zip]

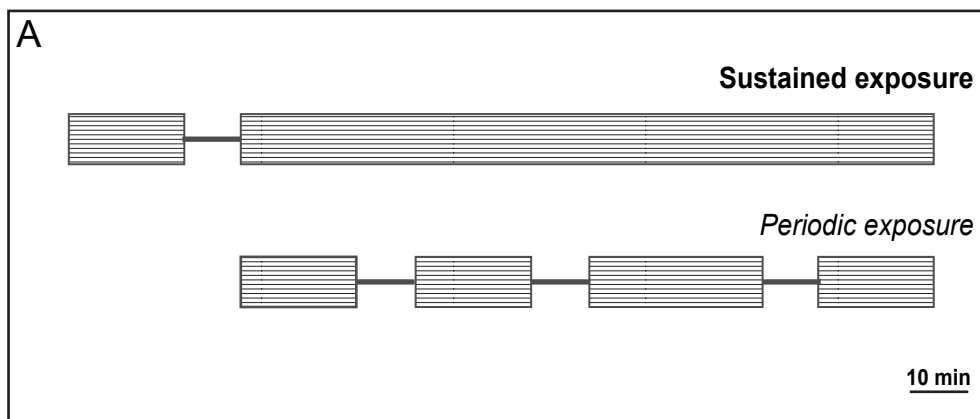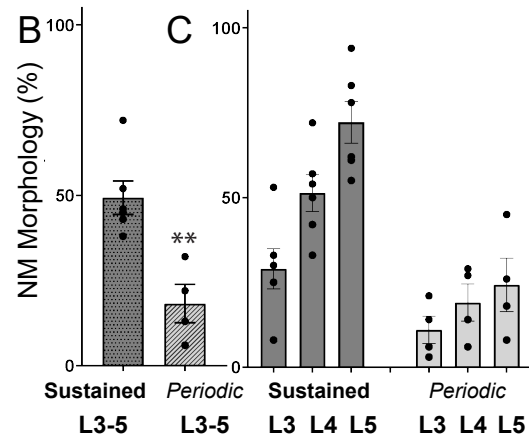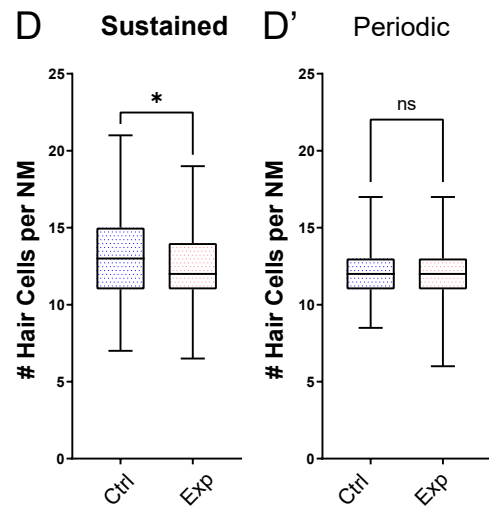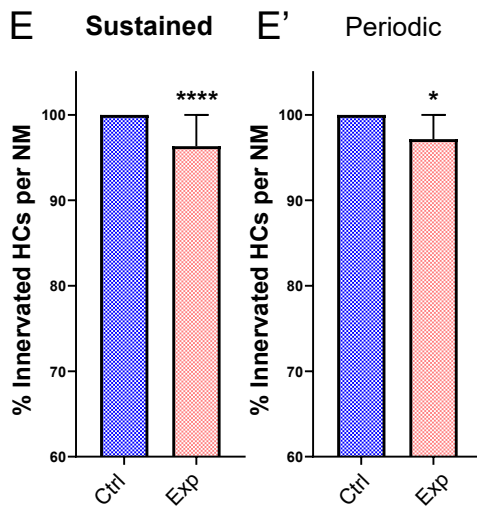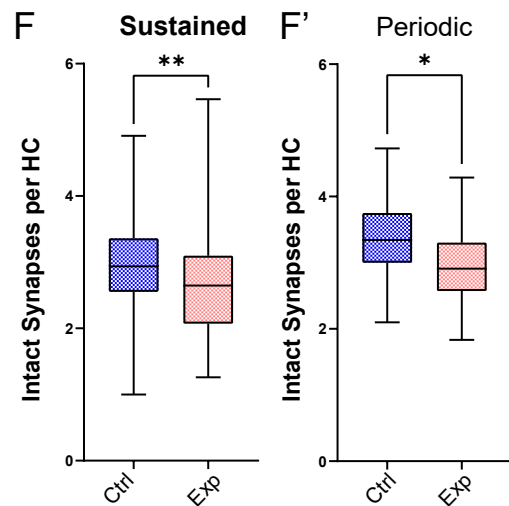

Supplement: supp [file elife-69264-supp-v1.zip]

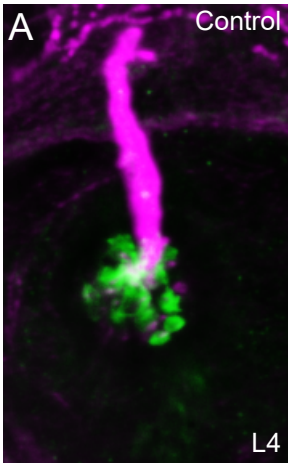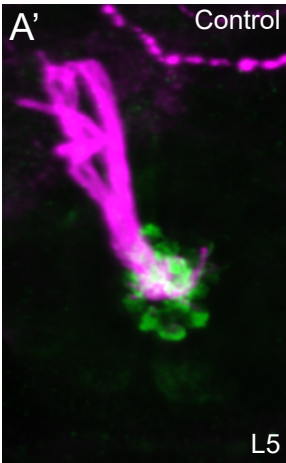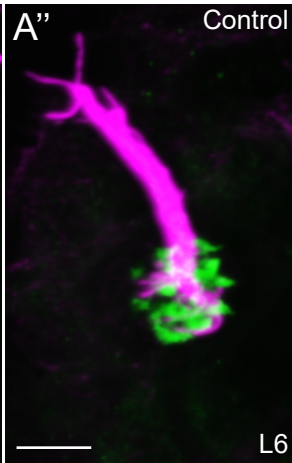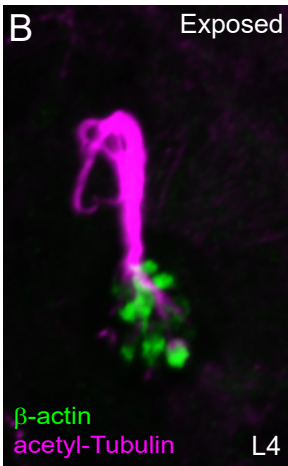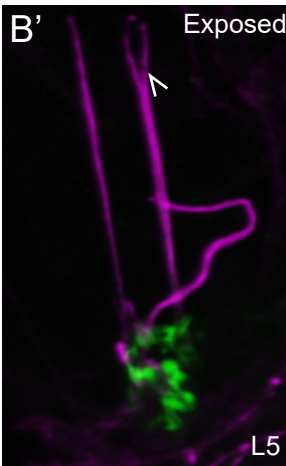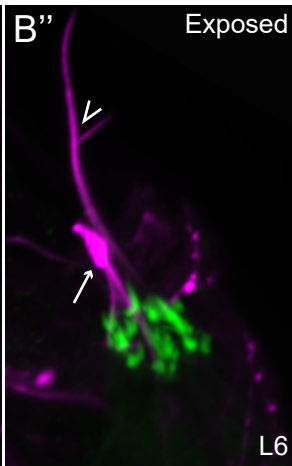

Supplement: supp [file elife-69264-supp-v1.zip]
